# Supplementary material
Source: PubMed Central journal article supplement (PMC11258874)
Supplement: NIHMS2002310-supplement-Supplementary_Information.pdf [file NIHMS2002310-supplement-Supplementary_Information.pdf]

# Gut OncoMicrobiome Signatures (GOMS) as next-generation biomarkers for cancer immunotherapy

In the format provided by the authors and unedited

# **Gut OncoMicrobiome Signatures (GOMS) as next-generation biomarkers for cancer immunotherapy**

Andrew Maltez Thomas, Marine Fidelle, Bertrand Routy, Guido Kroemer, Jennifer A. Wargo,  
Nicola Segata and Laurence Zitvogel

## **Supplementary files**

### **Table of contents**

|                                                                                                                                                                     |        |
|---------------------------------------------------------------------------------------------------------------------------------------------------------------------|--------|
| Supplementary FIG. 1   Microscopic and cellular description of the cancer-induced stress ileopathy                                                                  | ... 1  |
| Legends for Supplementary tables                                                                                                                                    | ... 2  |
| Supplementary TABLE 1   Pan-disease or pan-cancer GOMS versus healthy metagenomes and alignment with the proposed meta-analysis                                     | ... 4  |
| Supplementary TABLE 2   Cohort description for the meta-analysis comparing GOMS in individuals with and without cancer                                              | ... 5  |
| Supplementary TABLE 3   Detailed results of pan-cancer GOMS presented in FIG. 2 (summary)                                                                           | ... 6  |
| Supplementary TABLE 4   GOMS profiles across various cancer types                                                                                                   | ... 7  |
| Supplementary TABLE 5   Cohort description and machine learning analysis for responders versus non-responders among patients receiving immune-checkpoint inhibitors | ... 9  |
| Supplementary TABLE 6   Baseline GOMS associated with response rates in the mega-analysis presented in FIG. 3 (summary)                                             | ... 10 |
| Supplementary TABLE 7   Baseline GOMS associated with response rates in the meta-analysis presented in FIG. 4 (summary)                                             | ... 11 |
| Supplementary TABLE 8   Relationship between cancer-associated bacteria relevant for clinical outcome and confounding factors                                       | ... 13 |
| Supplementary methods                                                                                                                                               | ... 15 |
| Supplementary references                                                                                                                                            | ... 19 |

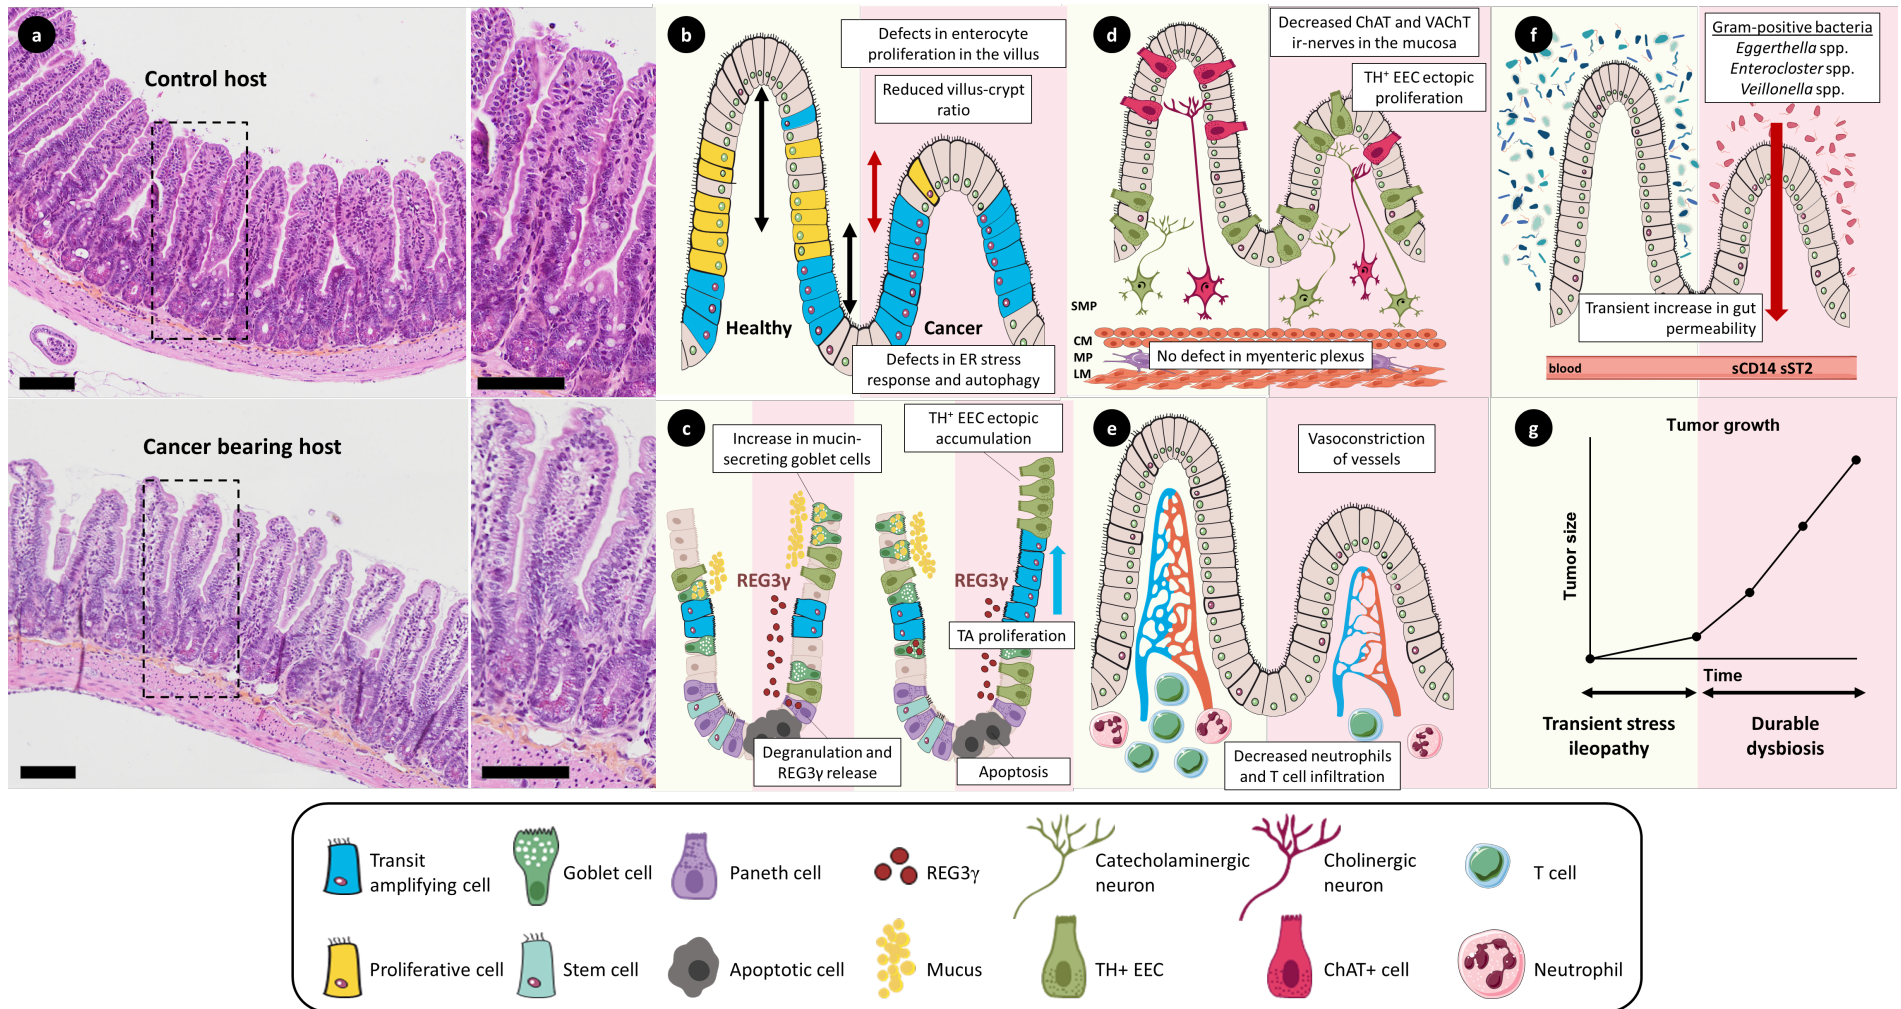

**Supplementary FIG. 1 | Microscopic and cellular description of the cancer-induced stress ileopathy.**

**A-G.** Proposed scenario of stress ileopathy induced during a tumorigenic process. Experimental demonstration in cancer bearing mice that tumour inoculation might trigger crypt apoptosis, activation of secretory cells, ectopic proliferation of tyrosine hydroxylase positive and enteroendocrine cells (TH<sup>+</sup> EEC) resulting in a disbalance between cholinergic and adrenergic signalling promoting a transient ileal mucosa atrophy but a protracted intestinal dysbiosis dominated by vancomycin-sensitive species belonging to the *Enterocloster* genus. Micrograph pictures of HE stained ileal tissues showing patchy abrasion of ileal villusities 7–10 days after tumour implantation in C57BL/6 mice. Bar scale: 100  $\mu$ m. ChAT, choline acetyltransferase; CM, circular muscle; EEC, enteroendocrine cell; ER, endoplasmic reticulum; ir-nerves, immunoreactive nerves; LM, longitudinal muscle; MP, myenteric plexus; REG3 $\gamma$ , Regenerating islet-derived protein 3 gamma; sCD14, soluble CD14; SMP, submucosal plexus; ST2, soluble interleukin-1 receptor-like 1; TA, transit amplifying cells; TH, tyrosine hydroxylase; VAcHT, vesicular acetylcholine transporter.

The Figure was partly generated using Servier Medical Art, provided by Servier, licensed under a Creative Commons Attribution 3.0 unported license.

## Legends for Supplementary Tables

### **Supplementary TABLE 1 | Pan-disease or pan-cancer GOMS versus healthy metagenomes and alignment with the proposed meta-analysis.**

This table aims at aligning bacteria composing the core gut microbiome (according to Dutch Microbiome Project; Gacesa et al.)<sup>22</sup>, the health-related microbiome (according to Gacesa et al., Yonekura et al.)<sup>22,24</sup> and faecal bacterial taxa with relative over-representation across various diseases or in patients with cancer regardless of histotypes (according to Gacesa et al., Yonekura et al.)<sup>22,24</sup>. The right columns aligned bacteria significantly retained in the meta-analysis comparing individuals with and without cancer (FIG. 2). The assessment of the effect of immune-checkpoint inhibitors on the intestinal taxonomic composition is currently underway and therefore cannot be provided in this table<sup>173,174</sup>. GOMS, Gut OncoMicrobiome signatures.

### **Supplementary TABLE 2 | Cohort description for the meta-analysis comparing GOMS in individuals with and without cancer.**

Refer to FIG. 2. GOMS, Gut OncoMicrobiome signatures.

### **Supplementary TABLE 3 | Detailed results of pan-cancer GOMS presented in FIG. 2.**

We implemented a Bayesian multinomial logistic-normal linear regression model called Pibble from the R package *fido*, linking covariates that included cancer status, age and gender to compositional overdispersed count data. We transformed taxonomic relative abundances into count values for Pibble via logistic-normal distribution modeling<sup>175</sup>. Log-ratios with 95% credible intervals were calculated for each species-level genome bin (SGB) and each pairwise cancer–control comparison and were supplied to a random effects model via the *rem\_mv* function in the *MetaVolcanoR* R package (v.1.4.0) using the restricted maximum-likelihood estimator model. We considered only SGBs with 95% credible intervals greater than or less than zero in > 50% of pairwise comparisons and with a rank in at least 6 of 8 cancers (Supplementary Methods). GOMS, Gut OncoMicrobiome signatures.

### **Supplementary TABLE 4 | GOMS profiles across various cancer types.**

We detail the bacteria orders, families and genus and/or species distinguishing individuals with and without cancer across three distinct cancer types for which data are available and have been reported. Only bacterial taxa relatively over-represented (but not under-represented) in faecal samples from patients with cancer (compared with those without) are annotated. Cancer histotype-specific bacteria are not in bold. GOMS, Gut OncoMicrobiome signatures.

**Supplementary TABLE 5 | Cohort description and machine learning analysis for responders versus non-responders among patients receiving immune-checkpoint inhibitors.**

We applied a leave-one-dataset-out (LODO) approach to the relative abundance of species-level genome bins (SGBs). Cohorts with more than 20 samples were used in the LODO approach and model performance was assessed using the area under the receiver operator (AUC) values. RF global CV: random forest global cross validation (Supplementary Methods). A Random Forest model applied in a LODO setting on a total of 761 patients with cancer receiving immune-checkpoint inhibitors (for whom sex and age were available) built to differentiate patients with objective responses (complete or partial responses) from non-responders (with stable or progressive disease) had a moderate and rather inconsistent predictive power across left-out datasets and a modest predictive power when merging all dataset for a single cross-validation evaluation (AUC 0.71). These results are consistent with individual reports showing that these groups were compositionally distinguishable but with limited overlap of biomarkers across studies. Of note, cohorts of patients with non-small-cell lung cancer or renal cell carcinoma displayed better AUC predictive values than melanoma cohorts.

**Supplementary TABLE 6 | Baseline GOMS associated with response rates in the mega-analysis presented in FIG. 3.**

This table reports results from the mega-analysis using Pibble models on clr transformed species-level genome bin (SGB)-level relative abundances presented in FIG. 3 (Supplementary Methods). LogRatio, 95% credible interval and taxonomy by family, genus, species and taxon are detailed. This table includes a summary of the results presented in FIG. 3 by family, genus and species levels. GOMS, Gut OncoMicrobiome signatures.

**Supplementary TABLE 7 | Baseline GOMS associated with response rates in the meta-analysis presented in FIG. 4.**

This table reports results from the meta-analysis using different differential abundance methods adjusting for age and gender to identify species-level genome bins (SGBs) associated with ORR, presented in FIG. 4 (Supplementary Methods). This table includes a summary of the results presented in FIG. 4 by family, genus and species levels. GOMS, Gut OncoMicrobiome signatures.

**Supplementary TABLE 8 | Relationships between cancer-associated bacteria relevant for clinical outcome and confounding factors.**

The bacteria retained as significant in the meta-analysis and mega-analysis presented in FIGS 2–3 and Supplementary TABLES 2–3 and 6–7 were highlighted according to their reported association with confounding factors in cancer (FIG. 1). PubMed-related searches as of October 2022 of stool shotgun metagenomics-defined taxonomic composition in various confounding factors of cancer, listed above. Red boxes, increased relative abundance of the metagenomic sequence (MGS); blue boxes, decreased relative abundance of the MGS; purple boxes, increased or decreased relative abundance of the MGS.

Supplementary TABLE 1 | Pan-disease or pan-cancer GOMS versus healthy metagenomes and alignment with the proposed meta-analysis.

| Order              | Family              | Genus (Species)                                                                                | Core gut microbiome | ref               | Health | ref                                    | Pan-disease | ref               | Pan-Cancer        | ref                 | Health (Meta-analysis) | ref      | Pan-Cancer (Meta-analysis) | ref                 |
|--------------------|---------------------|------------------------------------------------------------------------------------------------|---------------------|-------------------|--------|----------------------------------------|-------------|-------------------|-------------------|---------------------|------------------------|----------|----------------------------|---------------------|
| Acidaminococcales  | Acidaminococcaceae  | Acidaminococcus (A. fermentans)                                                                |                     |                   |        |                                        |             |                   | x                 | Yonekura, S. et al. |                        |          |                            |                     |
| Bifidobacteriales  | Bifidobacteriaceae  | Aeriscardovia (A. aeriphila)                                                                   |                     |                   | x      | Yonekura, S. et al.                    |             |                   |                   |                     |                        |          |                            |                     |
| Bacteroidales      | Rikenellaceae       | Alistipes (A. onderdonkii, A. putredinis, A. shahii)                                           | x                   | Gacesa, R. et al. |        |                                        |             |                   |                   |                     |                        |          |                            |                     |
| Bacteroidales      | Rikenellaceae       | Alistipes (A. senegalensis, A. shahii, A. communis (Bacteroidales bacterium pH8))              |                     |                   | x      | Gacesa, R. et al.                      |             |                   |                   |                     |                        |          |                            |                     |
| Eubacteriales      | Lachnospiraceae     | Anaerobutyricum (A. hallii)                                                                    |                     |                   | x      | Yonekura, S. et al.                    |             |                   |                   |                     |                        |          |                            |                     |
| Eubacteriales      | Lachnospiraceae     | Anaerostipes (A. hadrus)                                                                       |                     |                   | x      | Yonekura, S. et al.                    |             |                   |                   |                     |                        |          |                            |                     |
| Eubacteriales      | Oscillospiraceae    | Anaerotruncus (A. colliformis, A. sp.)                                                         |                     |                   |        |                                        | x           | Gacesa, R. et al. | x                 | Yonekura, S. et al. |                        |          | x                          | Figure 2            |
| Bacteroidales      | Bacteroidaceae      | Bacteroides (B. galacturonicus)                                                                |                     |                   | x      | Yonekura, S. et al.                    |             |                   |                   |                     |                        |          |                            |                     |
| Bacteroidales      | Bacteroidaceae      | Bacteroides (B. uniformis, B. vulgatus)                                                        | x                   | Gacesa, R. et al. |        |                                        |             |                   |                   |                     |                        |          |                            |                     |
| Bacteroidales      | Barnesiellaceae     | Barnesiella (B. intestinhominis)                                                               |                     |                   | x      | Gacesa, R. et al.                      |             |                   |                   |                     |                        |          |                            |                     |
| Bifidobacteriales  | Bifidobacteriaceae  | Bifidobacterium (B. adolescentis, B. pseudocatenulatum)                                        |                     |                   | x      | Gacesa, R. et al., Yonekura, S. et al. |             |                   |                   |                     |                        |          |                            |                     |
| Bifidobacteriales  | Bifidobacteriaceae  | Bifidobacterium (B. dentium)                                                                   |                     |                   |        |                                        | x           | Gacesa, R. et al. | x                 | Yonekura, S. et al. |                        |          | x                          | Figure 2            |
| Desulfobacteriales | Desulfobacteriaceae | Bilophila (B. wadsworthia)                                                                     |                     |                   |        |                                        |             |                   | x                 | Yonekura, S. et al. |                        |          |                            |                     |
| Eubacteriales      | Clostridiaceae      | Butyricoccus (B. sp. AM29-23AC)                                                                |                     |                   |        |                                        |             |                   |                   |                     | x                      | Figure 2 |                            |                     |
| Bacteroidales      | Odoribacteraceae    | Butyricimonas (B. synergistica, B. virosa)                                                     |                     |                   |        |                                        |             |                   | x                 | Yonekura, S. et al. |                        |          |                            |                     |
| Eubacteriales      | Lachnospiraceae     | Butyrivibrio (B. crossotus)                                                                    |                     |                   | x      | Gacesa, R. et al.                      |             |                   |                   |                     |                        |          |                            |                     |
| Campylobacteriales | Campylobacteraceae  | Campylobacter (C. gracilis)                                                                    |                     |                   |        |                                        |             |                   | x                 | Yonekura, S. et al. |                        |          |                            |                     |
| Clostridiales      | Clostridia          | Candidatus Pararuminococcus (CP. gallinarum)                                                   |                     |                   |        |                                        |             |                   |                   |                     |                        |          | x                          | Figure 2            |
| Clostridiales      | Clostridia          | Candidatus Schneewindia (CS. gallinarum)                                                       |                     |                   |        |                                        |             |                   |                   |                     |                        |          | x                          | Figure 2            |
| Eubacteriales      | Clostridiaceae      | Clostridium (C. boltae CAG:59, C. sp. CAG:58, sp. CAG:242)                                     |                     |                   |        |                                        |             |                   | x                 | Yonekura, S. et al. |                        |          |                            |                     |
| Eubacteriales      | Clostridiaceae      | Clostridium (C. sp. AF34-13, C. sp. AF34-10BH)                                                 |                     |                   |        |                                        |             |                   |                   |                     | x                      | Figure 2 |                            |                     |
| Eubacteriales      | Oscillospiraceae    | Clostridium leptum                                                                             |                     |                   |        |                                        | x           | Gacesa, R. et al. |                   |                     |                        |          |                            |                     |
| Coriobacteriales   | Coriobacteriaceae   | Collinsella (C. aerofaciens)                                                                   |                     |                   | x      | Yonekura, S. et al.                    |             |                   |                   |                     |                        |          |                            |                     |
| Eubacteriales      | Lachnospiraceae     | Coprococcus (C. comes)                                                                         |                     |                   | x      | Yonekura, S. et al.                    |             |                   |                   |                     |                        |          |                            |                     |
| Eubacteriales      | Lachnospiraceae     | Coprococcus (C. eutactus)                                                                      |                     |                   |        |                                        |             |                   |                   |                     | x                      | Figure 2 |                            |                     |
| Desulfobacteriales | Desulfobacteriaceae | Desulfobacterium (D. piger)                                                                    |                     |                   | x      | Gacesa, R. et al.                      |             |                   |                   |                     |                        |          |                            |                     |
| Veillonellales     | Veillonellaceae     | Dialister (D. sp. CAG:357)                                                                     |                     |                   | x      | Yonekura, S. et al.                    |             |                   |                   |                     |                        |          |                            |                     |
| Eubacteriales      | Lachnospiraceae     | Dorea (D. longicatena)                                                                         |                     |                   | x      | Gacesa, R. et al., Yonekura, S. et al. |             |                   |                   |                     |                        |          |                            |                     |
| Eubacteriales      | Oscillospiraceae    | Dysosmobacter (D. welbionis)                                                                   |                     |                   |        |                                        | x           | Gacesa, R. et al. |                   |                     |                        |          | x                          | Figure 2            |
| Eggerthellales     | Eggerthellaceae     | Eggerthella (E. lenta, E. sp.)                                                                 |                     |                   |        |                                        | x           | Gacesa, R. et al. |                   |                     |                        |          |                            |                     |
| Eubacteriales      | Lachnospiraceae     | Eisenbergiella (E. massiliensis, E. tayi)                                                      |                     |                   |        |                                        |             |                   | x                 | Yonekura, S. et al. |                        |          | x                          | Figure 2            |
| Eubacteriales      | Lachnospiraceae     | Enterocloster (E. asparagiformis, E. boltae, E. citroniae, E. clostridioformis, E. lavalensis) |                     |                   |        |                                        | x           | Gacesa, R. et al. | x                 | Yonekura, S. et al. |                        |          | x                          | Figure 2            |
| Lactobacillales    | Enterococcaceae     | Enterococcus (E. faecalis)                                                                     |                     |                   |        |                                        |             |                   |                   |                     |                        |          | x                          | Figure 2            |
| Erysipelotrichales | Erysipelotrichaceae | Erysipelatoclostridium (Clostridium innocuum)                                                  |                     |                   |        |                                        |             |                   |                   |                     |                        |          | x                          | Figure 2            |
| Eubacteriales      | Eubacteriaceae      | Eubacterium (E. ventriosum, E. sp. CAG:274)                                                    |                     |                   | x      | Yonekura, S. et al.                    |             |                   |                   |                     |                        |          |                            |                     |
| Eubacteriales      | Oscillospiraceae    | Faecalibacterium (F. prausnitzii)                                                              | x                   | Gacesa, R. et al. | x      | Gacesa, R. et al.                      |             |                   |                   |                     |                        |          |                            |                     |
| Tissierellales     | Peptoniphilaceae    | Finexaldia (F. magna)                                                                          |                     |                   | x      | Yonekura, S. et al.                    |             |                   |                   |                     |                        |          |                            |                     |
| Eubacteriales      | Oscillospiraceae    | Flavonifractor (F. plautii)                                                                    |                     |                   |        |                                        | x           | Gacesa, R. et al. |                   |                     |                        |          |                            |                     |
| Eubacteriales      | Lachnospiraceae     | Fusicatenibacter (F. saccharivorans)                                                           |                     |                   | x      | Yonekura, S. et al.                    |             |                   |                   |                     |                        |          |                            |                     |
| Enterobacteriales  | Hafniaceae          | Hafnia (H. alvei)                                                                              |                     |                   |        |                                        |             |                   | x                 | Yonekura, S. et al. |                        |          |                            |                     |
| Eubacteriales      | Oscillospiraceae    | Harrylintia (H. acetispara)                                                                    |                     |                   |        |                                        |             |                   | x                 | Yonekura, S. et al. |                        |          |                            |                     |
| Erysipelotrichales | Erysipelotrichaceae | Holdemanella (H. filiformis)                                                                   |                     |                   |        |                                        | x           | Gacesa, R. et al. |                   |                     |                        |          |                            |                     |
| Eubacteriales      | Clostridiaceae      | Hungatella (H. hathewayi)                                                                      |                     |                   |        |                                        | x           | Gacesa, R. et al. |                   |                     |                        |          | x                          | Figure 2            |
| Eubacteriales      | Oscillospiraceae    | Hydrogeniiclostridium (H. mannosilyticum)                                                      |                     |                   |        |                                        |             |                   |                   |                     |                        |          | x                          | Figure 2            |
| Eubacteriales      | Eubacteriales       | Intestinimonas (I. butyriciproducens)                                                          |                     |                   |        |                                        |             |                   | x                 | Yonekura, S. et al. |                        |          | x                          | Figure 2            |
| Eubacteriales      | Lachnospiraceae     | Lachnoclostridium (Clostridium scindens, L. sp. An138)                                         |                     |                   |        |                                        |             |                   |                   |                     |                        |          | x                          | Figure 2            |
| Eubacteriales      | Lachnospiraceae     | Lachnoclostridium (Clostridium symbiosum)                                                      |                     |                   |        |                                        |             |                   |                   |                     |                        |          | x                          | Figure 2            |
| Eubacteriales      | Lachnospiraceae     | Lachnospira (L. eligens, L. pectinoschiza, L. sp. NSI-43)                                      |                     |                   | x      | Yonekura, S. et al.                    |             |                   |                   |                     | x                      | Figure 2 |                            |                     |
| Eubacteriales      | Lachnospiraceae     | Lachnospiraceae (Eubacterium rectale)                                                          | x                   | Gacesa, R. et al. | x      | Yonekura, S. et al.                    |             |                   |                   |                     |                        |          |                            |                     |
| Lactobacillales    | Lactobacillaceae    | Lactobacillus (L. rogosae)                                                                     |                     |                   | x      | Yonekura, S. et al.                    |             |                   |                   |                     |                        |          |                            |                     |
| Eubacteriales      | Oscillospiraceae    | Lawsonibacter (L. asaccharolyticus)                                                            |                     |                   |        |                                        |             |                   |                   |                     |                        |          | x                          | Yonekura, S. et al. |
| Lactobacillales    | Lactobacillaceae    | Ligilactobacillus (L. ruminis)                                                                 |                     |                   | x      | Yonekura, S. et al.                    |             |                   |                   |                     |                        |          |                            |                     |
| Eubacteriales      | Lachnospiraceae     | Mediterraneibacter (Ruminococcus gnavus, R. torques)                                           |                     |                   | x      | Yonekura, S. et al.                    |             | x                 | Gacesa, R. et al. |                     |                        |          | x                          | Figure 2            |
| Eubacteriales      | Lachnospiraceae     | Merdimonas (Merdimonas faecis)                                                                 |                     |                   |        |                                        |             |                   |                   |                     |                        |          | x                          | Figure 2            |
| Eubacteriales      | Oscillospiraceae    | Oscillibacter (Oscillibacter sp.)                                                              | x                   | Gacesa, R. et al. |        |                                        |             | x                 | Gacesa, R. et al. |                     | x                      | Figure 2 |                            |                     |
| Bacteroidales      | Prevotellaceae      | Paraprevotella (P. clara, P. sp.)                                                              |                     |                   | x      | Gacesa, R. et al.                      |             |                   |                   |                     |                        |          |                            |                     |
| Bacteroidales      | Prevotellaceae      | Prevotella (P. copri, P. stercorea, P. sp. CAG:520)                                            |                     |                   | x      | Gacesa, R. et al., Yonekura, S. et al. |             |                   |                   |                     |                        |          |                            |                     |
| Eubacteriales      | Oscillospiraceae    | Pseudoflavonifractor (P. capillosus, P. sp.)                                                   |                     |                   |        |                                        |             | x                 | Gacesa, R. et al. |                     |                        |          | x                          | Figure 2            |
| Eubacteriales      | Lachnospiraceae     | Roseburia (R. faecis, R. sp. CAG:471)                                                          |                     |                   | x      | Yonekura, S. et al.                    |             |                   |                   |                     |                        |          |                            |                     |
| Eubacteriales      | Lachnospiraceae     | Roseburia (R. hominis)                                                                         |                     |                   |        |                                        |             |                   |                   |                     | x                      | Figure 2 |                            |                     |
| Eubacteriales      | Oscillospiraceae    | Ruthenibacterium (R. lactatiformans)                                                           |                     |                   |        |                                        |             |                   | x                 | Yonekura, S. et al. |                        |          | x                          | Figure 2            |
| Lactobacillales    | Streptococcaceae    | Streptococcus (S. parasanguinis, S. salivarius)                                                |                     |                   |        |                                        |             | x                 | Gacesa, R. et al. |                     |                        |          |                            |                     |
| Eubacteriales      | Oscillospiraceae    | Subdoligranulum sp.                                                                            |                     |                   |        |                                        |             |                   |                   |                     |                        |          |                            |                     |
| Erysipelotrichales | Turicibacteraceae   | Turicibacter (T. sanguinis)                                                                    |                     |                   | x      | Gacesa, R. et al.                      |             | x                 | Gacesa, R. et al. |                     |                        |          |                            |                     |
| Oscillospiraceae   | Faecalibacterium    | unclassified Faecalibacterium (Faecalibacterium sp.)                                           |                     |                   |        |                                        |             |                   |                   |                     | x                      | Figure 2 |                            |                     |
| Eubacteriales      | Lachnospiraceae     | unclassified Lachnospira (Lachnospiraceae bacterium)                                           |                     |                   |        |                                        |             | x                 | Gacesa, R. et al. |                     | x                      | Figure 2 |                            |                     |
| Eubacteriales      | Oscillospiraceae    | unclassified Oscillospiraceae (Oscillospiraceae bacterium)                                     |                     |                   |        |                                        |             |                   |                   |                     | x                      | Figure 2 | x                          | Figure 2            |
| Eubacteriales      | Oscillospiraceae    | unclassified Oscillospiraceae (Ruminococcaceae bacterium D16)                                  |                     |                   |        |                                        |             |                   | x                 | Gacesa, R. et al.   |                        |          |                            |                     |
| Eubacteriales      | Peptococcaceae      | unclassified Peptococcaceae (Peptococcaceae bacterium)                                         |                     |                   |        |                                        |             |                   |                   |                     | x                      | Figure 2 |                            |                     |
| Veillonellales     | Veillonellaceae     | Veillonella (V. parvula)                                                                       |                     |                   |        |                                        |             | x                 | Gacesa, R. et al. |                     |                        |          |                            |                     |

**Supplementary TABLE 2 | Cohort description for the meta-analysis comparing GOMS in individuals with and without cancer.**

| Study Name                                            | Cancer            | Number of patients | Cohort name                       | Country              | PubMedID | in cMD |
|-------------------------------------------------------|-------------------|--------------------|-----------------------------------|----------------------|----------|--------|
| Terrisse et al., <u>JITC.</u> , 2022                  | Prostate Cancer   | 33                 | Oncobiotics                       | France               | 35296557 | no     |
| Pernigoni et al., <u>Science.</u> , 2021              | Prostate Cancer   | 74                 |                                   | Switzerland/UK       | 34618582 | no     |
| Terrisse et al., <u>Cell Death &amp; Diff.</u> , 2021 | Breast Cancer     | 35                 | CANTO                             | France               | 33963313 | no     |
| Derosa et al., <u>Nature Med.</u> , 2022              | Lung Cancer       | 338                | Lung Oncobiotics                  | France               | 35115705 | no     |
| Routy et al., <u>Science.</u> , 2018                  | Lung Cancer       | 65                 |                                   | France               | 29097494 | no     |
| Yonekura et al., <u>Cancer Discovery.</u> , 2022      | Ovarian Cancer    | 29                 |                                   | France               | 34930787 | no     |
| Derosa et al., <u>European Urology.</u> , 2020        | Kidney Cancer     | 69                 |                                   | France               | 32376136 | no     |
| Kartal et al., <u>Gut.</u> , 2022                     | Pancreatic Cancer | 111                |                                   | Spain/Germany        | 35260444 | no     |
| Nagata et al., <u>Gastroenterology.</u> , 2022        | Pancreatic Cancer | 43                 |                                   | Japan                | 35788347 | no     |
| Spencer et al., <u>Science.</u> , 2021                | Melanoma          | 112                |                                   | USA                  | 34941392 | no     |
| Lee et al., <u>Nature Med.</u> , 2022                 | Melanoma          | 163                | PRIMM                             | UK/Netherlands/Spain | 35228751 | yes    |
| McCulloch et al., <u>Nature Med.</u> , 2022           | Melanoma          | 94                 |                                   | USA                  | 35228752 | no     |
| Gopalakrishnan et al., <u>Science.</u> , 2018         | Melanoma          | 24                 |                                   | USA                  | 29097493 | yes    |
| Wind et al., <u>Melanoma Research.</u> , 2020         | Melanoma          | 20                 |                                   | Netherlands          | 31990790 | yes    |
| Frankel et al., <u>Neoplasia.</u> , 2017              | Melanoma          | 37                 |                                   | USA                  | 28923537 | yes    |
| Peters et al., <u>Genome Med.</u> , 2019              | Melanoma          | 27                 |                                   | USA                  | 31597568 | yes    |
| Thomas et al., <u>Nat Med.</u> , 2019                 | Colorectal Cancer | 61                 |                                   | Italy                | 30936548 | yes    |
| Wirbel et al., <u>Nat Med.</u> , 2019                 | Colorectal Cancer | 60                 |                                   | Germany              | 30936547 | yes    |
| Yu et al., <u>Gut.</u> , 2017                         | Colorectal Cancer | 75                 |                                   | China                | 26408641 | yes    |
| Feng et al., <u>Nat Commun.</u> , 2015                | Colorectal Cancer | 46                 |                                   | Austria              | 25758642 | yes    |
| Vogtmann et al., <u>PLoS One.</u> , 2016              | Colorectal Cancer | 52                 |                                   | USA                  | 27171425 | yes    |
| Zeller et al., <u>Mol Syst Biol.</u> , 2014           | Colorectal Cancer | 53                 |                                   | France               | 25432777 | yes    |
| Yachida et al., <u>Nat Med.</u> , 2019                | Colorectal Cancer | 258                |                                   | Japan                | 31171880 | yes    |
| <b>Total</b>                                          |                   | <b>1879</b>        |                                   |                      |          |        |
| Xie et al., <u>Cell Syst.</u> , 2016                  | Healthy Controls  | 250                | Twins UK                          | UK                   | 27818083 | yes    |
| Asnicar et al., <u>Nat Med.</u> , 2021                | Healthy Controls  | 1098               | PREDICT 1                         | UK/USA               | 33432175 | yes    |
| Zhernakova et al., <u>Science.</u> , 2016             | Healthy Controls  | 1129               | Lifelines Deep                    | Netherlands          | 27126040 | yes    |
| Schirmer et al., <u>Cell.</u> , 2016                  | Healthy Controls  | 465                | Human Functional Genomics Project | Netherlands          | 27814509 | yes    |
| HMP Consortium., <u>Nature.</u> , 2012                | Healthy Controls  | 94                 | HMP 1                             | USA                  | 22699609 | yes    |
| Qin et al., <u>Nature.</u> , 2014                     | Healthy Controls  | 114                |                                   | China                | 25079328 | yes    |
| Qin et al., <u>Nature.</u> , 2012                     | Healthy Controls  | 174                |                                   | China                | 23023125 | yes    |
| Vieira-Silva et al., <u>Nature.</u> , 2020            | Healthy Controls  | 322                | MetaCARDIS                        | Germany/France       | 32433607 | yes    |
| De Filippis et al., <u>Cell Host Microbe.</u> , 2019  | Healthy Controls  | 97                 |                                   | Italy                | 30799264 | yes    |
| Keohane et al., <u>Nat Med.</u> , 2020                | Healthy Controls  | 117                |                                   | Ireland              | 32632193 | yes    |
| Dhakan et al., <u>Gigascience.</u> , 2019             | Healthy Controls  | 110                |                                   | India                | 30698687 | yes    |
| Yachida et al., <u>Nat Med.</u> , 2019                | Healthy Controls  | 246                |                                   | Japan                | 31171880 | yes    |
| Nielsen et al., <u>Nat Biotechnol.</u> , 2014         | Healthy Controls  | 247                | MetaHIT                           | Denmark/Spain        | 24997787 | yes    |
| Zeevi et al., <u>Cell.</u> , 2015                     | Healthy Controls  | 878                |                                   | Israel               | 26590418 | yes    |
| <b>Total</b>                                          |                   | <b>5341</b>        |                                   |                      |          |        |

cMD: curatedMetagenomicData

Supplementary TABLE 3 | Detailed results of pan-cancer GOMS presented in FIG. 2 (summary)

| Health        |                         |                                                                            | Pan-Cancer                                                                 |                                            |                                                                                               |
|---------------|-------------------------|----------------------------------------------------------------------------|----------------------------------------------------------------------------|--------------------------------------------|-----------------------------------------------------------------------------------------------|
| Order         | Family                  | Genus (Species)                                                            | Order                                                                      | Family                                     | Genus (Species)                                                                               |
| Eubacteriales | Clostridiaceae          | <i>Butyricicoccus</i> ( <i>B. sp. AM29-23AC</i> )                          | <i>Bifidobacteriales</i>                                                   | <i>Bifidobacteriaceae</i>                  | <i>Bifidobacterium</i> ( <i>Bifidobacterium dentium</i> )                                     |
|               |                         | <i>Clostridium</i> ( <i>C. sp. AF34-13, C. sp. AF34-10BH</i> )             | <i>Clostridiales</i>                                                       | <i>Clostridia</i>                          | <i>Candidatus Pararuminococcus</i> ( <i>CP. gallinarum</i> )                                  |
|               | <i>Lachnospiraceae</i>  | <i>Coprococcus</i> ( <i>C. eutactus</i> )                                  |                                                                            | <i>Clostridia</i>                          | <i>Candidatus Schneewindia</i> ( <i>CS. gallinarum</i> )                                      |
|               |                         | <i>Lachnospira</i> ( <i>L. eligens, L. pectinoschiza, L. sp. NSJ-43</i> )  | <i>Erysipelotrichales</i>                                                  | <i>Erysipelotrichaceae</i>                 | <i>Erysipelatoclostridium</i> ( <i>Clostridium innocuum</i> )                                 |
|               |                         | <i>Roseburia</i> ( <i>R. hominis</i> )                                     | <i>Eubacteriales</i>                                                       | <i>Clostridiaceae</i>                      | <i>Hungatella</i> ( <i>H. hathewayi</i> )                                                     |
|               |                         | <i>unclassified Lachnospira</i> ( <i>Lachnospiraceae bacterium</i> )       |                                                                            | <i>Eubacteriales</i>                       | <i>Intestinimonas</i> ( <i>I. butyriciproducens</i> )                                         |
|               | <i>Oscillospiraceae</i> | <i>Oscillibacter</i> ( <i>Oscillibacter sp. ER4</i> )                      |                                                                            | <i>Lachnospiraceae</i>                     | <i>Eisenbergiella</i> ( <i>E. massiliensis, E. tayi</i> )                                     |
|               |                         | <i>unclassified Oscillospiraceae</i> ( <i>Oscillospiraceae bacterium</i> ) |                                                                            |                                            | <i>Enterocloster</i> ( <i>E. aldensis, E. citroniae, E. clostridioformis, E. lavalensis</i> ) |
|               | <i>Peptococcaceae</i>   | <i>unclassified Peptococcaceae</i> ( <i>Peptococcaceae bacterium</i> )     |                                                                            |                                            | <i>Lachnoclostridium</i> ( <i>Clostridium scindens, L. sp. An138</i> )                        |
|               | <i>Faecalibacterium</i> | <i>unclassified Faecalibacterium</i> ( <i>Faecalibacterium sp.</i> )       |                                                                            |                                            | <i>Mediterraneibacter</i> ( <i>Ruminococcus torques</i> )                                     |
|               |                         | <i>Merdimonas</i> ( <i>Merdimonas faecis</i> )                             |                                                                            |                                            |                                                                                               |
|               |                         | <i>Oscillospiraceae</i>                                                    |                                                                            |                                            | <i>Anaerotruncus</i> ( <i>A. colihominis</i> )                                                |
|               |                         |                                                                            |                                                                            |                                            | <i>Dysosmobacter</i> ( <i>D. welbionis</i> )                                                  |
|               |                         |                                                                            |                                                                            |                                            | <i>Hydrogeniiclostridium</i> ( <i>H. mannosilyticum</i> )                                     |
|               |                         |                                                                            | <i>Pseudoflavonifractor</i> ( <i>Pseudoflavonifractor sp.</i> )            |                                            |                                                                                               |
|               |                         |                                                                            | <i>Ruthenibacterium</i> ( <i>R. lactatiformans</i> )                       |                                            |                                                                                               |
|               |                         |                                                                            | <i>unclassified Oscillospiraceae</i> ( <i>Oscillospiraceae bacterium</i> ) |                                            |                                                                                               |
|               |                         | <i>Lactobacillales</i>                                                     | <i>Enterococcaceae</i>                                                     | <i>Enterococcus</i> ( <i>E. faecalis</i> ) |                                                                                               |



Supplementary TABLE 4 | GOMS profiles across various cancer types.

| Order              | Family                | Genus (Species)                                                                                                                                                                                                                  | Breast cancer | ref                                      | Pancreatic ductal carcinoma | ref               | Colorectal cancer | ref                                                          |
|--------------------|-----------------------|----------------------------------------------------------------------------------------------------------------------------------------------------------------------------------------------------------------------------------|---------------|------------------------------------------|-----------------------------|-------------------|-------------------|--------------------------------------------------------------|
| Acidaminococcales  | Acidaminococcaceae    | Acidaminococcus ( <i>A. fermentans</i> )                                                                                                                                                                                         | x             | Yonekura, S. et al.                      |                             |                   | x                 | Yonekura, S. et al.                                          |
| Actinomycetales    | Actinomycetaceae      | Actinomyces ( <i>A. graevenitzi</i> , <i>A. sp. ICM39</i> )                                                                                                                                                                      |               |                                          | x                           | Nagata, N. et al. | x                 | Thomas, A. M. et al.                                         |
| Bacteroidales      | Rikenellaceae         | <i>Alistipes</i> ( <i>A. indistinctus</i> , <i>A. putredinis</i> , <i>A. shahii</i> , <i>A. sp. CAG:831</i> , <i>A. communis</i> ( <i>Bacteroidales bacterium ph8</i> ))                                                         | x             | Terrisse, S. et al., Yonekura, S. et al. |                             |                   | x                 | Yonekura, S. et al.                                          |
| Bifidobacteriales  | Bifidobacteriaceae    | <i>Alloscardovia</i> ( <i>A. omnicoles</i> )                                                                                                                                                                                     |               |                                          | x                           | Kartal, E. et al. |                   |                                                              |
| Tissierellales     | Peptoniphilaceae      | <i>Anaerococcus</i> ( <i>A. obeisensis</i> , <i>A. vaginalis</i> )                                                                                                                                                               |               |                                          |                             |                   | x                 | Wirbel, J. et al.                                            |
| Eubacteriales      | Oscillospiraceae      | <i>Anaerotruncus</i> ( <i>A. calihominis</i> )                                                                                                                                                                                   | x             | Yonekura, S. et al.                      |                             |                   | x                 | Thomas, A. M. et al., Yonekura, S. et al.                    |
| Bacteroidales      | Bacteroidaceae        | <i>Bacteroides</i> ( <i>B. finegoldii</i> , <i>B. fragilis</i> , <i>B. nordii</i> , <i>B. ovatus</i> , <i>B. sp. 43_108</i> , <i>B. sp. CAG:633</i> , <i>B. sp. CAG:661</i> , <i>B. thetaiotaomicron</i> , <i>B. uniformis</i> ) | x             | Terrisse, S. et al., Yonekura, S. et al. | x                           | Kartal, E. et al. | x                 | Yonekura, S. et al.                                          |
| Bacteroidales      | Bacteroidaceae        | <i>Bacteroides</i> ( <i>B. fragilis</i> )                                                                                                                                                                                        | x             | Terrisse, S. et al.                      |                             |                   |                   |                                                              |
| Bacteroidales      | Barnesiellaceae       | <i>Barnesiella</i> ( <i>B. intestinhominis</i> )                                                                                                                                                                                 | x             | Terrisse, S. et al.                      |                             |                   |                   |                                                              |
| Bifidobacteriales  | Bifidobacteriaceae    | <i>Bifidobacterium</i> ( <i>B. dentium</i> )                                                                                                                                                                                     | x             | Yonekura, S. et al.                      |                             |                   | x                 | Yonekura, S. et al.                                          |
| Desulfobacteriales | Desulfobacteriaceae   | <i>Bilophila</i> ( <i>B. wadsworthia</i> )                                                                                                                                                                                       | x             | Terrisse, S. et al., Yonekura, S. et al. |                             |                   | x                 | Yonekura, S. et al.                                          |
| Bacteroidales      | Odoribacteraceae      | <i>Butyrivibrio</i> ( <i>B. synergistica</i> , <i>B. virosa</i> )                                                                                                                                                                | x             | Yonekura, S. et al.                      |                             |                   | x                 | Yonekura, S. et al.                                          |
| Eubacteriales      | Lachnospiraceae       | <i>Butyrivibrio</i> ( <i>B. crossotus</i> )                                                                                                                                                                                      |               |                                          | x                           | Kartal, E. et al. |                   |                                                              |
| Campylobacteriales | Campylobacteraceae    | <i>Campylobacter</i> ( <i>C. gracilis</i> )                                                                                                                                                                                      | x             | Yonekura, S. et al.                      |                             |                   | x                 | Yonekura, S. et al.                                          |
| Eggerthellales     | Eggerthellaceae       | <i>Eggerthella</i> ( <i>E. lenta</i> )                                                                                                                                                                                           | x             | Yonekura, S. et al.                      |                             |                   | x                 | Yonekura, S. et al.                                          |
| Eubacteriales      | Lachnospiraceae       | <i>Eisenbergiella</i> ( <i>E. massiliensis</i> , <i>E. tayi</i> )                                                                                                                                                                | x             | Yonekura, S. et al.                      |                             |                   | x                 | Yonekura, S. et al.                                          |
| Eubacteriales      | Lachnospiraceae       | <i>Enterocloster</i> ( <i>E. aldenensis</i> , <i>E. asparagiformis</i> , <i>E. boltae</i> , <i>E. citroniae</i> , <i>E. clostridioformis</i> , <i>E. lavalensis</i> )                                                            | x             | Terrisse, S. et al., Yonekura, S. et al. | x                           | Nagata, N. et al. | x                 | Wirbel, J. et al., Yonekura, S. et al.                       |
| Lactobacillales    | Enterococcaceae       | <i>Enterococcus</i> ( <i>E. faecalis</i> , <i>E. durans</i> )                                                                                                                                                                    | x             | Yonekura, S. et al.                      |                             |                   | x                 | Yonekura, S. et al.                                          |
| Enterobacteriales  | Enterobacteriaceae    | <i>Escherichia</i> ( <i>E. coli</i> )                                                                                                                                                                                            | x             | Yonekura, S. et al.                      |                             |                   | x                 | Thomas, A. M. et al., Yonekura, S. et al.                    |
| Eubacteriales      | Eubacteriaceae        | <i>Eubacterium</i> ( <i>E. sp. CAG:180</i> )                                                                                                                                                                                     | x             | Yonekura, S. et al.                      |                             |                   | x                 | Yonekura, S. et al.                                          |
| Eubacteriales      | Oscillospiraceae      | <i>Faecolibacterium</i> ( <i>F. prausnitzii</i> )                                                                                                                                                                                | x             | Terrisse, S. et al.                      |                             |                   |                   |                                                              |
| Eubacteriales      | Oscillospiraceae      | <i>Flavonifractor</i> ( <i>F. plautii</i> , <i>F. sp. An100</i> )                                                                                                                                                                | x             | Yonekura, S. et al.                      |                             |                   | x                 | Yonekura, S. et al.                                          |
| Fusobacteriales    | Fusobacteriaceae      | <i>Fusobacterium</i> ( <i>F. nucleatum</i> subsp. <i>animalis</i> , <i>nucleatum</i> , <i>vincentii</i> , <i>F. sp. oral taxon 370</i> )                                                                                         |               |                                          |                             |                   | x                 | Thomas, A. M. et al., Wirbel, J. et al.                      |
| Bacillales         | Bacillales Family XI. | <i>Gemella</i> ( <i>G. morbillorum</i> )                                                                                                                                                                                         |               |                                          |                             |                   | x                 | Thomas, A. M. et al., Wirbel, J. et al.                      |
| Enterobacteriales  | Hafniaceae            | <i>Hafnia</i> ( <i>H. alvei</i> , <i>H. paralvei</i> )                                                                                                                                                                           | x             | Yonekura, S. et al.                      |                             |                   | x                 | Yonekura, S. et al.                                          |
| Eubacteriales      | Oscillospiraceae      | <i>Harryflintia</i> ( <i>H. acetispora</i> )                                                                                                                                                                                     | x             | Yonekura, S. et al.                      |                             |                   | x                 | Yonekura, S. et al.                                          |
| Eubacteriales      | Clostridiaceae        | <i>Hungatella</i> ( <i>H. hathewayi</i> )                                                                                                                                                                                        | x             | Yonekura, S. et al.                      | x                           | Nagata, N. et al. | x                 | Wirbel, J. et al., Yonekura, S. et al.                       |
| Eubacteriales      | Eubacteriaceae        | <i>Intestinimonas</i> ( <i>I. butyriciproducens</i> )                                                                                                                                                                            | x             | Yonekura, S. et al.                      |                             |                   | x                 | Yonekura, S. et al.                                          |
| Enterobacteriales  | Enterobacteriaceae    | <i>Klebsiella</i> ( <i>K. pneumoniae</i> )                                                                                                                                                                                       | x             | Terrisse, S. et al.                      |                             |                   |                   |                                                              |
| Eubacteriales      | Lachnospiraceae       | <i>Lachnoclostridium</i> ( <i>Clostridium symbiosum</i> )                                                                                                                                                                        |               |                                          | x                           | Nagata, N. et al. | x                 | Thomas, A. M. et al., Wirbel, J. et al., Yonekura, S. et al. |
| Eubacteriales      | Lachnospiraceae       | <i>Lachnospira</i> ( <i>L. elligens</i> )                                                                                                                                                                                        | x             | Terrisse, S. et al.                      |                             |                   |                   |                                                              |
| Eubacteriales      | Oscillospiraceae      | <i>Lawsonibacter</i> ( <i>L. asaccharolyticus</i> )                                                                                                                                                                              | x             | Yonekura, S. et al.                      |                             |                   | x                 | Yonekura, S. et al.                                          |
| Eubacteriales      | Lachnospiraceae       | <i>Mediterraneibacter</i> ( <i>Ruminococcus torques</i> )                                                                                                                                                                        |               |                                          |                             |                   | x                 | Wirbel, J. et al.                                            |
| Methanobacteriales | Methanobacteriaceae   | <i>Methanobrevibacter</i> ( <i>M. smithii</i> )                                                                                                                                                                                  |               |                                          | x                           | Kartal, E. et al. |                   |                                                              |
| Enterobacteriales  | Morganellaceae        | <i>Morganella</i> ( <i>M. morganii</i> )                                                                                                                                                                                         | x             | Yonekura, S. et al.                      |                             |                   | x                 | Yonekura, S. et al.                                          |
| Bacteroidales      | Odoribacteraceae      | <i>Odoribacter</i> ( <i>O. splanchnicus</i> )                                                                                                                                                                                    | x             | Terrisse, S. et al., Yonekura, S. et al. |                             |                   |                   |                                                              |
| Coriobacteriales   | Atopobiaceae          | <i>Olsenella</i> ( <i>O. uli</i> )                                                                                                                                                                                               | x             | Yonekura, S. et al.                      |                             |                   | x                 | Yonekura, S. et al.                                          |
| Eubacteriales      | Oscillospiraceae      | <i>Oscillospiraceae incertae sedis</i> ( <i>Clostridium leptum</i> )                                                                                                                                                             |               |                                          |                             |                   | x                 | Thomas, A. M. et al.                                         |
| Bacteroidales      | Tannerellaceae        | <i>Parabacteroides</i> ( <i>P. distasonis</i> , <i>P. merdae</i> )                                                                                                                                                               | x             | Terrisse, S. et al., Yonekura, S. et al. |                             |                   | x                 | Yonekura, S. et al.                                          |
| Tissierellales     | Peptoniphilaceae      | <i>Parvimonas</i> ( <i>P. micra</i> , <i>P. sp.</i> )                                                                                                                                                                            |               |                                          |                             |                   | x                 | Thomas, A. M. et al., Wirbel, J. et al.                      |
| Eubacteriales      | Peptostreptococcaceae | <i>Peptostreptococcus</i> ( <i>P. anaerobius</i> , <i>P. stomatis</i> )                                                                                                                                                          |               |                                          |                             |                   | x                 | Thomas, A. M. et al., Wirbel, J. et al.                      |
| Acidaminococcales  | Acidaminococcaceae    | <i>Phascolarctobacterium</i> ( <i>P. sp. CAG:266</i> )                                                                                                                                                                           | x             | Yonekura, S. et al.                      |                             |                   | x                 | Yonekura, S. et al.                                          |
| Bacteroidales      | Bacteroidaceae        | <i>Phocaecicola</i> ( <i>P. barnesiae</i> )                                                                                                                                                                                      | x             | Terrisse, S. et al.                      |                             |                   |                   |                                                              |
| Bacteroidales      | Porphyromonadaceae    | <i>Porphyromonas</i> ( <i>P. asaccharolytica</i> , <i>P. somerae</i> , <i>P. uenonis</i> )                                                                                                                                       |               |                                          |                             |                   | x                 | Thomas, A. M. et al., Wirbel, J. et al.                      |
| Bacteroidales      | Prevotellaceae        | <i>Prevotella</i> ( <i>P. copri</i> , <i>P. intermedia</i> , <i>P. nigrescens</i> , <i>P. sp. CAG:617</i> , <i>P. sp.</i> )                                                                                                      | x             | Terrisse, S. et al., Yonekura, S. et al. | x                           | Kartal, E. et al. | x                 | Thomas, A. M. et al., Wirbel, J. et al., Yonekura, S. et al. |
| Enterobacteriales  | Morganellaceae        | <i>Proteus</i> ( <i>P. mirabilis</i> )                                                                                                                                                                                           | x             | Yonekura, S. et al.                      |                             |                   | x                 | Yonekura, S. et al.                                          |
| Eubacteriales      | Lachnospiraceae       | <i>Roseburia</i> ( <i>R. intestinalis</i> )                                                                                                                                                                                      | x             | Terrisse, S. et al.                      |                             |                   |                   |                                                              |
| Eubacteriales      | Oscillospiraceae      | <i>Ruthenibacterium</i> ( <i>R. lactatiformans</i> )                                                                                                                                                                             | x             | Yonekura, S. et al.                      |                             |                   | x                 | Yonekura, S. et al.                                          |
| Bacteroidales      | Porphyromonadaceae    | <i>Sanguibacteroides</i> ( <i>S. justesenii</i> )                                                                                                                                                                                | x             | Yonekura, S. et al.                      |                             |                   | x                 | Yonekura, S. et al.                                          |
| Erysipelotrichales | Erysipelotrichaceae   | <i>Salobacterium</i> ( <i>S. moorei</i> )                                                                                                                                                                                        |               |                                          |                             |                   | x                 | Wirbel, J. et al.                                            |
| Lactobacillales    | Streptococcaceae      | <i>Streptococcus</i> ( <i>S. anginosus</i> , <i>S. oralis</i> , <i>S. vestibularis</i> )                                                                                                                                         |               |                                          | x                           | Nagata, N. et al. |                   |                                                              |
| Lactobacillales    | Streptococcaceae      | <i>Streptococcus</i> ( <i>S. parasanguinis</i> )                                                                                                                                                                                 |               |                                          |                             |                   | x                 | Thomas, A. M. et al.                                         |
| Eubacteriales      | Oscillospiraceae      | <i>Subdoligranulum</i> ( <i>S. sp. 4_3_54A2FAA</i> )                                                                                                                                                                             |               |                                          |                             |                   | x                 | Wirbel, J. et al.                                            |
| Burkholderiales    | Sutterellaceae        | <i>Sutterella</i> ( <i>S. wadsworthensis</i> )                                                                                                                                                                                   |               |                                          | x                           | Nagata, N. et al. |                   |                                                              |
| Desulfobacteriales | Desulfobacteriaceae   | unclassified <i>Desulfobacteriaceae</i> ( <i>D. bacterium</i> )                                                                                                                                                                  | x             | Yonekura, S. et al.                      |                             |                   | x                 | Yonekura, S. et al.                                          |

|                |                  |                                                                   |   |                                          |   |                                      |   |                      |
|----------------|------------------|-------------------------------------------------------------------|---|------------------------------------------|---|--------------------------------------|---|----------------------|
| Eubacteriales  | Lachnospiraceae  | unclassified Lachnospiraceae (L. bacterium 3_1_57FAA_CT1 )        |   |                                          |   |                                      | x | Thomas, A. M. et al. |
| Eubacteriales  | Oscillospiraceae | unclassified Oscillospiraceae (Ruminococcaceae bacterium D16, D5) | x | Terrisse, S. et al., Yonekura, S. et al. |   |                                      | x | Yonekura, S. et al.  |
| Veillonellales | Veillonellaceae  | Veillonella (V. atypica, V. dispar, V. parvula)                   |   |                                          | x | Kartal, E. et al., Nagata, N. et al. |   |                      |

**Supplementary TABLE 5 | Cohort description and machine learning analysis for responders versus non-responders among patients receiving immune-checkpoint inhibitors.**

| Cohort                | Cancer   | ICI           | NR         | R          | Total      | RF                      | LASSO    | Reference                                     | Country     | PubMedID | in cMD |
|-----------------------|----------|---------------|------------|------------|------------|-------------------------|----------|-----------------------------------------------|-------------|----------|--------|
|                       |          |               |            |            |            | LODO AUC                | LODO AUC |                                               |             |          |        |
| FrankelAE_2017        | Melanoma | CTLA-4 + PD-1 | 20         | 17         | <b>37</b>  | 0.66                    | 0.55     | Frankel et al., <i>Neoplasia</i> , 2017       | USA         | 28923537 | yes    |
| GopalakrishnanaV_2018 | Melanoma | PD-1          | 13         | 10         | <b>23</b>  | 0.58                    | 0.62     | Gopalakrishnan et al., <i>Science</i> , 2018  | USA         | 29097493 | yes    |
| Manchester_LeeK_2022  | Melanoma | CTLA-4 + PD-1 | 15         | 10         | <b>25</b>  | 0.73                    | 0.52     | Lee et al., <i>Nature Med.</i> , 2022         | UK          | 35228751 | yes    |
| McCullochJA_2022      | Melanoma | PD-1          | 35         | 59         | <b>94</b>  | 0.53                    | 0.52     | McCulloch et al., <i>Nature Med.</i> , 2022   | USA         | 35228752 | no     |
| PRIMM-NL_LeeK_2022    | Melanoma | CTLA-4 + PD-1 | 33         | 22         | <b>55</b>  | 0.62                    | 0.57     | Lee et al., <i>Nature Med.</i> , 2022         | Netherlands | 35228751 | yes    |
| PRIMM-UK_LeeK_2022    | Melanoma | CTLA-4 + PD-1 | 32         | 23         | <b>55</b>  | 0.49                    | 0.42     | Lee et al., <i>Nature Med.</i> , 2022         | UK          | 35228751 | yes    |
| DerosaL_2022          | NSCLC    | PD-1          | 263        | 75         | <b>338</b> | 0.70                    | 0.55     | Derosa et al., <i>Nature Med.</i> , 2022      | France      | 35115705 | no     |
| RoutyB_2018_Lung      | NSCLC    | PD-1          | 53         | 12         | <b>65</b>  | 0.78                    | 0.70     | Routy et al., <i>Science</i> , 2018           | France      | 29097494 | no     |
| DerosaL_2020          | RCC      | PD-1          | 49         | 20         | <b>69</b>  | 0.65                    | 0.66     | Derosa et al., <i>European Urology</i> , 2020 | France      | 32376136 | no     |
| <b>Total</b>          |          |               | <b>513</b> | <b>248</b> | <b>761</b> | <b>RF Global CV AUC</b> |          |                                               |             |          |        |
|                       |          |               |            |            | <b>761</b> | <b>0.71</b>             |          |                                               |             |          |        |

|                                                        |
|--------------------------------------------------------|
| ICI: Immune checkpoint inhibitors                      |
| NR: Non-responder (SD+PD)                              |
| R: Responder (CR+PR)                                   |
| RF: Random Forrest                                     |
| LASSO: Least Absolute Shrinkage and Selection Operator |
| AUC: area under the curve                              |
| cMD: curatedMetagenomicData                            |

Supplementary TABLE 6 | Baseline GOMS associated with response rates in the mega-analysis presented in FIG. 3 (summary)

| R (CR+PR)                                  |                                                                                          |                                                                                       | NR (SD+PD)                |                                                                  |                                                                                                               |                                    |
|--------------------------------------------|------------------------------------------------------------------------------------------|---------------------------------------------------------------------------------------|---------------------------|------------------------------------------------------------------|---------------------------------------------------------------------------------------------------------------|------------------------------------|
| Order                                      | Family                                                                                   | Genus (Species)                                                                       | Order                     | Family                                                           | Genus (Species)                                                                                               |                                    |
| Acidaminococcales                          | Acidaminococcaceae                                                                       | Phascolarctobacterium ( <i>P. succinatutens</i> )                                     | Actinomycetales           | Actinomycetaceae                                                 | Actinobaculum ( <i>A. sp. oral taxon 183</i> )                                                                |                                    |
| Bacteroidales                              | Bacteroidaceae                                                                           | Bacteroides ( <i>B. caccae</i> , <i>B. nordii</i> )                                   |                           |                                                                  | Actinomyces ( <i>A. graevenitzii</i> , <i>A. sp. ICM58</i> , <i>A. sp. oral taxon 448</i> )                   |                                    |
| Bifidobacteriales                          | Bifidobacteriaceae                                                                       | Bifidobacterium ( <i>Bifidobacterium adolescentis</i> )                               | Bacteroidales             | Bacteroidaceae                                                   | Bacteroides ( <i>B. clarus</i> , <i>B. fragilis</i> )                                                         |                                    |
| Burkholderiales                            | Sutterellaceae                                                                           | Sutterella ( <i>Sutterella wadsworthensis</i> )                                       |                           | Rikenellaceae                                                    | unclassified Rikenellaceae ( <i>Rikenellaceae bacterium</i> )                                                 |                                    |
| Eubacteriales                              | Clostridiaceae                                                                           | Clostridium ( <i>Clostridium sp. AM22-11AC</i> )                                      | Bifidobacteriales         | Bifidobacteriaceae                                               | Scardovia ( <i>S. wiggisiae</i> )                                                                             |                                    |
|                                            | Eubacteriaceae                                                                           | Eubacterium ( <i>Eubacterium ventriosum</i> )                                         | Coriobacteriales          | Atopobiaceae                                                     | Lancefieldella ( <i>L. parvula</i> )                                                                          |                                    |
|                                            | Lachnospiraceae                                                                          | Anaerobutyricum ( <i>Anaerobutyricum hallii</i> )                                     |                           | Coriobacteriaceae                                                | Enorma ( <i>E. massiliensis</i> )                                                                             |                                    |
|                                            |                                                                                          | Anaerostipes ( <i>Anaerostipes hadrus</i> )                                           | Desulfovibrionales        | Desulfovibrionaceae                                              | Bilophila ( <i>B. wadsworthia</i> )                                                                           |                                    |
|                                            |                                                                                          | Blautia ( <i>B. faecis</i> , <i>B. wexlerae</i> , <i>B. sp. MSK.20.85</i> )           | Eggerthellales            | Eggerthellaceae                                                  | Eggerthella ( <i>E. lenta</i> )                                                                               |                                    |
|                                            |                                                                                          | Coprococcus ( <i>Coprococcus eutactus</i> )                                           | Enterobacteriales         | Enterobacteriaceae                                               | Escherichia ( <i>E. coli</i> )                                                                                |                                    |
|                                            |                                                                                          | Dorea ( <i>D. formicigenerans</i> , <i>D. sp. AF24-7LB</i> )                          | Erysipelotrichales        | Erysipelotrichaceae                                              | Erysipelatoclostridium ( <i>E. ramosum</i> , <i>Clostridium innocuum</i> , <i>Clostridium saccharogumia</i> ) |                                    |
|                                            |                                                                                          | Fusicatenibacter ( <i>Fusicatenibacter saccharivorans</i> )                           |                           |                                                                  | Faecalitalea ( <i>F. cylindroides</i> )                                                                       |                                    |
|                                            |                                                                                          | Lachnospira ( <i>Lachnospira eligens</i> )                                            |                           |                                                                  | Massilicoli ( <i>M. timonensis</i> )                                                                          |                                    |
|                                            |                                                                                          | Lachnospiraceae_unclassified ( <i>Eubacterium rectale</i> , <i>L. bacterium</i> )     | Eubacteriales             | Christensenellaceae                                              | Christensenella ( <i>C. sp. Marseille-P3954</i> , <i>C. bacterium NSJ-53</i> )                                |                                    |
|                                            |                                                                                          | Mediterraneibacter ( <i>Mediterraneibacter butyricigenes</i> )                        |                           |                                                                  | Clostridiaceae                                                                                                | Hungatella ( <i>H. hathewayi</i> ) |
|                                            |                                                                                          | Mediterraneibacter ( <i>Ruminococcus torques</i> )                                    |                           |                                                                  | Lachnospiraceae                                                                                               | Eisenbergiella ( <i>E. tayi</i> )  |
|                                            | Roseburia ( <i>Roseburia faecis</i> , <i>R. intestinalis</i> , <i>R. inulinivorans</i> ) | Enterocloster ( <i>E. aldensis</i> , <i>E. bolteae</i> , <i>E. lavalensis</i> )       |                           |                                                                  |                                                                                                               |                                    |
|                                            | Faecalibacterium ( <i>Faecalibacterium prausnitzii</i> )                                 | Faecalicatena ( <i>F. fissicatena</i> )                                               |                           |                                                                  |                                                                                                               |                                    |
|                                            | Ruminococcus ( <i>R. bicirculans</i> , <i>R. sp. NSJ-71</i> )                            | Lachnoclostridium ( <i>Clostridium symbiosum</i> )                                    |                           |                                                                  |                                                                                                               |                                    |
|                                            | unclassified Oscillospiraceae ( <i>Oscillospiraceae bacterium</i> )                      | Lachnoclostridium ( <i>L. phocaense</i> , <i>L. sp. An118</i> , <i>L. bacterium</i> ) |                           |                                                                  |                                                                                                               |                                    |
|                                            | Peptostreptococcaceae                                                                    | Intestinibacter ( <i>Intestinibacter bartlettii</i> )                                 | Oscillospiraceae          | Anaerotruncus ( <i>A. colihominis</i> , <i>A. massiliensis</i> ) |                                                                                                               |                                    |
| Lawsonibacter ( <i>Lawsonibacter sp.</i> ) |                                                                                          |                                                                                       |                           |                                                                  |                                                                                                               |                                    |
| Verrucomicrobiales                         | Akkermansiaceae                                                                          | Akkermansia ( <i>Akkermansia muciniphila</i> )                                        | Eubacteriales Family XIII | Mogibacterium ( <i>M. diversum</i> )                             |                                                                                                               |                                    |
|                                            |                                                                                          |                                                                                       |                           | Enterococcaceae                                                  | Enterococcus ( <i>E. durans</i> )                                                                             |                                    |
|                                            |                                                                                          |                                                                                       | Lactobacillales           | Streptococcaceae                                                 | Streptococcus ( <i>S. constellatus</i> , <i>S. cristatus</i> , <i>S. mutans</i> , <i>S. sanguinis</i> )       |                                    |
|                                            |                                                                                          |                                                                                       | Propionibacteriales       | Propionibacteriaceae                                             | Propionibacterium ( <i>P. acidifaciens</i> )                                                                  |                                    |
|                                            |                                                                                          |                                                                                       | Veillonellales            | Veillonellaceae                                                  | Dialister ( <i>D. invisus</i> )                                                                               |                                    |
|                                            |                                                                                          |                                                                                       |                           |                                                                  | Veillonella ( <i>V. parvula</i> )                                                                             |                                    |

R (CR+PR): responder status based on RECIST1.1 criterium (CR: complete response, PR: partial response)

NR (SD+PD): non-responder status based on RECIST1.1 criterium (SD: stable disease, PD: progression disease)

**Supplementary TABLE 7 | Baseline GOMS associated with response rates in the meta-analysis presented in FIG. 4 (summary)**

| R (CR+PR)                      |                                |                                                                         | NR (SD+PD)              |                                                   |                                                                                                |                                                 |
|--------------------------------|--------------------------------|-------------------------------------------------------------------------|-------------------------|---------------------------------------------------|------------------------------------------------------------------------------------------------|-------------------------------------------------|
| Order                          | Family                         | Genus (Species)                                                         | Order                   | Family                                            | Genus (Species)                                                                                |                                                 |
| <i>Firmicutes unclassified</i> | <i>Firmicutes unclassified</i> | <i>Firmicutes unclassified (Firmicutes bacterium AF16-15)</i>           | <i>Actinomycetales</i>  | <i>Actinomycetaceae</i>                           | <i>Actinomyces (Actinomyces graevenitzii)</i>                                                  |                                                 |
| <i>Acidaminococcales</i>       | <i>Acidaminococcaceae</i>      | <i>Phascolarctobacterium (P. succinatutens)</i>                         | <i>Eggerthellales</i>   | <i>Eggerthellaceae</i>                            | <i>Eggerthella (Eggerthella lenta)</i>                                                         |                                                 |
| <i>Bacteroidales</i>           | <i>Bacteroidaceae</i>          | <i>Bacteroides (B. nordii)</i>                                          | <i>Eubacteriales</i>    | <i>Erysipelotrichaceae</i>                        | <i>Faecalitalea (Faecalitalea cylindroides)</i>                                                |                                                 |
|                                |                                | <i>Phocaeicola (P. coprophilus)</i>                                     |                         | <i>Clostridiaceae</i>                             | <i>Hungatella (Hungatella hathewayi)</i>                                                       |                                                 |
|                                | <i>Prevotellaceae</i>          | <i>Prevotella (P. copri clade A)</i>                                    |                         | <i>Lachnospiraceae</i>                            | <i>Enterocloster (Enterocloster bolteae)</i>                                                   |                                                 |
|                                | <i>Rikenellaceae</i>           | <i>Alistipes (A. shahii)</i>                                            |                         |                                                   | <i>Lachnoclostridium (Lachnoclostridium phocaeense)</i>                                        |                                                 |
| <i>Bifidobacteriales</i>       | <i>Bifidobacteriaceae</i>      | <i>Bifidobacterium (B. adolescentis, B. bifidum)</i>                    | <i>Oscillospiraceae</i> | <i>Anaerotruncus (Anaerotruncus massiliensis)</i> |                                                                                                |                                                 |
| <i>Clostridia</i>              | <i>Clostridia</i>              | <i>Candidatus Metalachnospira (CM. gallinarum)</i>                      |                         | <i>Synergistaceae</i>                             | <i>unclassified Oscillospiraceae (Ruminococcaceae bacterium, Ruminococcaceae bacterium D5)</i> |                                                 |
|                                |                                | <i>Candidatus Heritagella (CH.intestinalis)</i>                         | <i>Synergistales</i>    |                                                   | <i>Synergistaceae</i>                                                                          | <i>Cloacibacillus (Cloacibacillus porcorum)</i> |
| <i>Coriobacteriales</i>        | <i>Coriobacteriaceae</i>       | <i>Collinsella (C. bouchesdurhonensis)</i>                              | <i>Veillonellales</i>   | <i>Veillonellaceae</i>                            | <i>Dialister (Dialister invisus)</i>                                                           |                                                 |
| <i>Eubacteriales</i>           | <i>Eubacteriaceae</i>          | <i>Eubacterium (E. sp. AM28-29)</i>                                     |                         |                                                   |                                                                                                |                                                 |
|                                | <i>Eubacteriales</i>           | <i>Intestinimonas (I. timonensis)</i>                                   |                         |                                                   |                                                                                                |                                                 |
|                                | <i>Lachnospiraceae</i>         | <i>Anaerobutyricum (A. hallii)</i>                                      |                         |                                                   |                                                                                                |                                                 |
|                                |                                | <i>Blautia (B. faecicola)</i>                                           |                         |                                                   |                                                                                                |                                                 |
|                                |                                | <i>Coprococcus (C. catus, C. eutactus)</i>                              |                         |                                                   |                                                                                                |                                                 |
|                                |                                | <i>Lacrimispora (L. celerecrescens)</i>                                 |                         |                                                   |                                                                                                |                                                 |
|                                |                                | <i>Mediterraneibacter (Ruminococcus torques)</i>                        |                         |                                                   |                                                                                                |                                                 |
|                                |                                | <i>Roseburia (R. faecis, R. hominis, R. inulinivorans)</i>              |                         |                                                   |                                                                                                |                                                 |
|                                |                                | <i>unclassified Lachnospiraceae (Eubacterium rectale, L. bacterium)</i> |                         |                                                   |                                                                                                |                                                 |
|                                | <i>Oscillospiraceae</i>        | <i>Flavonifractor (Flavonifractor sp. An10)</i>                         |                         |                                                   |                                                                                                |                                                 |

|                        |                              |                                                      |  |  |  |
|------------------------|------------------------------|------------------------------------------------------|--|--|--|
|                        | <i>Usciospiraceae</i>        | <i>Ruminococcus (R. bicirculans, R. sp NSJ 71)</i>   |  |  |  |
|                        | <i>Peptostreptococcaceae</i> | <i>Intestinibacter (I. bartlettii)</i>               |  |  |  |
| <i>Lactobacillales</i> | <i>Lactobacillaceae</i>      | <i>Limosilactobacillus (Lactobacillus vaginalis)</i> |  |  |  |

|                                                                                                             |
|-------------------------------------------------------------------------------------------------------------|
| R (CR+PR): responder status based on RECIST1.1 criterium (CR: complete response, PR: partial response)      |
| NR (SD+PD): non-responder status based on RECIST1.1 criterium (SD: stable disease, PD: progression disease) |

Supplementary TABLE 8 | Relationship between cancer-associated bacteria relevant for clinical outcome and confounding factors.

| Cat.                                | Bacteria issued from the Meta and Mega-Analysis | Cancer                         | Healthy aging | Unhealthy aging | Comorbidities | Obesity | Cachexia & frailty | Diabetes | Lung dysfunctions | Liver dysfunctions | Heart & circulatory failures | Comedications | Antibiotics | Gastrointestinal tract | Anti-inflammatory tract | Antidiabetics | Anti-cancer therapies | Chemotherapy | Hormonotherapy | Protein kinase inhibitors |
|-------------------------------------|-------------------------------------------------|--------------------------------|---------------|-----------------|---------------|---------|--------------------|----------|-------------------|--------------------|------------------------------|---------------|-------------|------------------------|-------------------------|---------------|-----------------------|--------------|----------------|---------------------------|
|                                     |                                                 |                                |               |                 |               |         |                    |          |                   |                    |                              |               |             |                        |                         |               |                       |              |                |                           |
| Cancer and NR                       | <i>Anaerotruncus colihominis</i>                |                                |               |                 |               |         |                    |          |                   |                    |                              |               |             |                        |                         |               |                       |              |                |                           |
|                                     | <i>Bacteroides clarus</i>                       |                                |               |                 |               |         |                    |          |                   |                    |                              |               |             |                        |                         |               |                       |              |                |                           |
|                                     | <i>Bacteroides fragilis</i>                     |                                |               |                 |               |         |                    |          |                   |                    |                              |               |             |                        |                         |               |                       |              |                |                           |
|                                     | <i>Bifidobacterium dentium</i>                  |                                |               |                 |               |         |                    |          |                   |                    |                              |               |             |                        |                         |               |                       |              |                |                           |
|                                     | <i>Bilophila wadsworthia</i>                    |                                |               |                 |               |         |                    |          |                   |                    |                              |               |             |                        |                         |               |                       |              |                |                           |
|                                     | <i>Clostridium innocuum</i>                     |                                |               |                 |               |         |                    |          |                   |                    |                              |               |             |                        |                         |               |                       |              |                |                           |
|                                     | <i>Clostridium scindens</i>                     |                                |               |                 |               |         |                    |          |                   |                    |                              |               |             |                        |                         |               |                       |              |                |                           |
|                                     | <i>Clostridium symbiosum</i>                    |                                |               |                 |               |         |                    |          |                   |                    |                              |               |             |                        |                         |               |                       |              |                |                           |
|                                     | <i>Dialister invisus</i>                        |                                |               |                 |               |         |                    |          |                   |                    |                              |               |             |                        |                         |               |                       |              |                |                           |
|                                     | <i>Eggerthella lenta</i>                        |                                |               |                 |               |         |                    |          |                   |                    |                              |               |             |                        |                         |               |                       |              |                |                           |
|                                     | <i>Eisenbergiella massiliensis</i>              |                                |               |                 |               |         |                    |          |                   |                    |                              |               |             |                        |                         |               |                       |              |                |                           |
|                                     | <i>Eisenbergiella tayi</i>                      |                                |               |                 |               |         |                    |          |                   |                    |                              |               |             |                        |                         |               |                       |              |                |                           |
|                                     | <i>Enterocloster aldenensis</i>                 |                                |               |                 |               |         |                    |          |                   |                    |                              |               |             |                        |                         |               |                       |              |                |                           |
|                                     | <i>Enterocloster bolteae</i>                    |                                |               |                 |               |         |                    |          |                   |                    |                              |               |             |                        |                         |               |                       |              |                |                           |
|                                     | <i>Enterocloster citroniae</i>                  |                                |               |                 |               |         |                    |          |                   |                    |                              |               |             |                        |                         |               |                       |              |                |                           |
|                                     | <i>Enterocloster clostridioformis</i>           |                                |               |                 |               |         |                    |          |                   |                    |                              |               |             |                        |                         |               |                       |              |                |                           |
|                                     | <i>Enterocloster lavalensis</i>                 |                                |               |                 |               |         |                    |          |                   |                    |                              |               |             |                        |                         |               |                       |              |                |                           |
|                                     | <i>Erysipelatoclostridium ramosum</i>           |                                |               |                 |               |         |                    |          |                   |                    |                              |               |             |                        |                         |               |                       |              |                |                           |
|                                     | <i>Escherichia coli</i>                         |                                |               |                 |               |         |                    |          |                   |                    |                              |               |             |                        |                         |               |                       |              |                |                           |
|                                     | <i>Faecalicatena fissicatena</i>                |                                |               |                 |               |         |                    |          |                   |                    |                              |               |             |                        |                         |               |                       |              |                |                           |
|                                     | <i>Faecalitalea cylindroides</i>                |                                |               |                 |               |         |                    |          |                   |                    |                              |               |             |                        |                         |               |                       |              |                |                           |
|                                     | <i>Hungatella hathewayi</i>                     |                                |               |                 |               |         |                    |          |                   |                    |                              |               |             |                        |                         |               |                       |              |                |                           |
|                                     | <i>Intestinimonas butyriciproducens</i>         |                                |               |                 |               |         |                    |          |                   |                    |                              |               |             |                        |                         |               |                       |              |                |                           |
|                                     | <i>Lancefieldella parvula</i>                   |                                |               |                 |               |         |                    |          |                   |                    |                              |               |             |                        |                         |               |                       |              |                |                           |
|                                     | <i>Ruminococcaceae bacterium D5</i>             |                                |               |                 |               |         |                    |          |                   |                    |                              |               |             |                        |                         |               |                       |              |                |                           |
|                                     | <i>Ruminococcus torques</i>                     |                                |               |                 |               |         |                    |          |                   |                    |                              |               |             |                        |                         |               |                       |              |                |                           |
|                                     | <i>Ruthenibacterium lactatiformans</i>          |                                |               |                 |               |         |                    |          |                   |                    |                              |               |             |                        |                         |               |                       |              |                |                           |
|                                     | <i>Scardovia wiggisiae</i>                      |                                |               |                 |               |         |                    |          |                   |                    |                              |               |             |                        |                         |               |                       |              |                |                           |
|                                     | <i>Streptococcus cristatus</i>                  |                                |               |                 |               |         |                    |          |                   |                    |                              |               |             |                        |                         |               |                       |              |                |                           |
|                                     | <i>Streptococcus mutans</i>                     |                                |               |                 |               |         |                    |          |                   |                    |                              |               |             |                        |                         |               |                       |              |                |                           |
|                                     | <i>Streptococcus sanguinis</i>                  |                                |               |                 |               |         |                    |          |                   |                    |                              |               |             |                        |                         |               |                       |              |                |                           |
|                                     | <i>Veillonella parvula</i>                      |                                |               |                 |               |         |                    |          |                   |                    |                              |               |             |                        |                         |               |                       |              |                |                           |
|                                     | Control and R                                   | <i>Akkermansia muciniphila</i> |               |                 |               |         |                    |          |                   |                    |                              |               |             |                        |                         |               |                       |              |                |                           |
| <i>Alistipes shahii</i>             |                                                 |                                |               |                 |               |         |                    |          |                   |                    |                              |               |             |                        |                         |               |                       |              |                |                           |
| <i>Anaerobutyricum hallii</i>       |                                                 |                                |               |                 |               |         |                    |          |                   |                    |                              |               |             |                        |                         |               |                       |              |                |                           |
| <i>Anaerostipes hadrus</i>          |                                                 |                                |               |                 |               |         |                    |          |                   |                    |                              |               |             |                        |                         |               |                       |              |                |                           |
| <i>Bacteroides caccae</i>           |                                                 |                                |               |                 |               |         |                    |          |                   |                    |                              |               |             |                        |                         |               |                       |              |                |                           |
| <i>Bacteroides nordii</i>           |                                                 |                                |               |                 |               |         |                    |          |                   |                    |                              |               |             |                        |                         |               |                       |              |                |                           |
| <i>Bifidobacterium adolescentis</i> |                                                 |                                |               |                 |               |         |                    |          |                   |                    |                              |               |             |                        |                         |               |                       |              |                |                           |
| <i>Bifidobacterium bifidum</i>      |                                                 |                                |               |                 |               |         |                    |          |                   |                    |                              |               |             |                        |                         |               |                       |              |                |                           |
| <i>Blautia wexlerae</i>             |                                                 |                                |               |                 |               |         |                    |          |                   |                    |                              |               |             |                        |                         |               |                       |              |                |                           |
| <i>Coprococcus catus</i>            |                                                 |                                |               |                 |               |         |                    |          |                   |                    |                              |               |             |                        |                         |               |                       |              |                |                           |
| <i>Coprococcus eutactus</i>         |                                                 |                                |               |                 |               |         |                    |          |                   |                    |                              |               |             |                        |                         |               |                       |              |                |                           |
| <i>Dorea formicigenerans</i>        |                                                 |                                |               |                 |               |         |                    |          |                   |                    |                              |               |             |                        |                         |               |                       |              |                |                           |
| <i>Eubacterium rectale</i>          |                                                 |                                |               |                 |               |         |                    |          |                   |                    |                              |               |             |                        |                         |               |                       |              |                |                           |
| <i>Eubacterium ventriosum</i>       |                                                 |                                |               |                 |               |         |                    |          |                   |                    |                              |               |             |                        |                         |               |                       |              |                |                           |
| <i>Faecalibacterium prausnitzii</i> |                                                 |                                |               |                 |               |         |                    |          |                   |                    |                              |               |             |                        |                         |               |                       |              |                |                           |

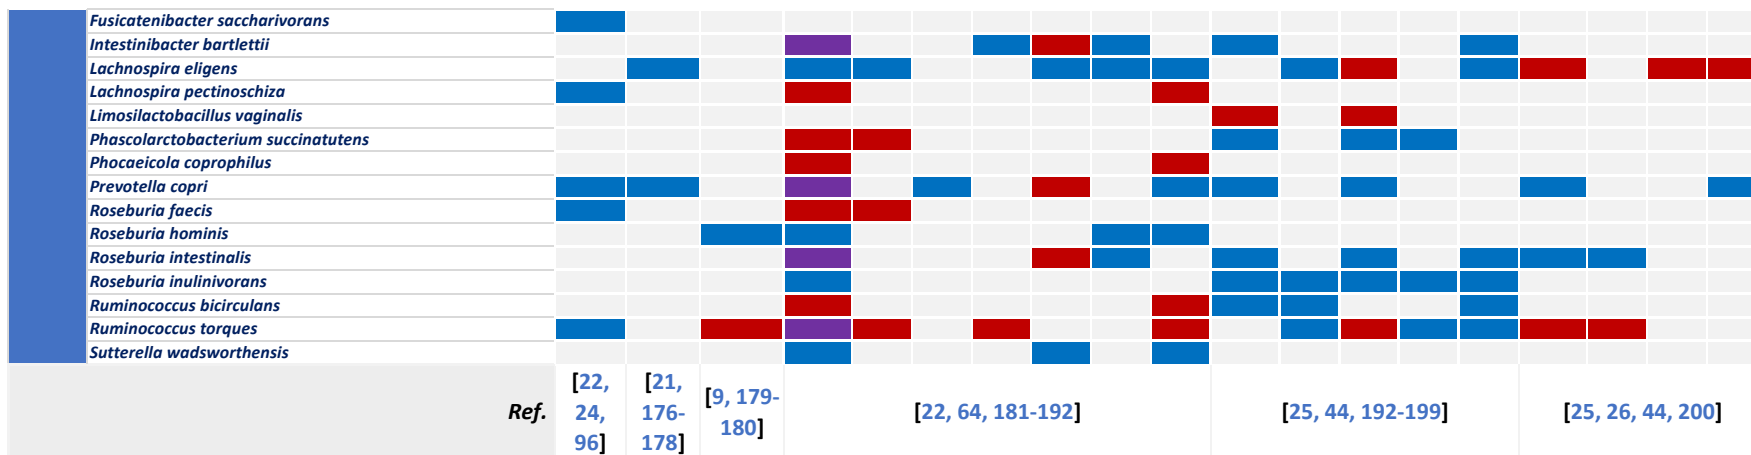

|                        |                        |                     |                              |                       |
|------------------------|------------------------|---------------------|------------------------------|-----------------------|
| Yonekura et al., 2020; | Li et al., 2022;       | Luan et al., 2020;  | Qin et al., 2014;            | Aasmets et al., 2022  |
| Gacesa et al., 2022;   | Rampelli et al., 2020; | Ghosh et al., 2020; | Liu et al., 2017;            | Clooney et al., 2016  |
| Park et al., 2022      | Wang et al., 2022;     | Zhang et al., 2021  | Wang et al., 2018;           | Derosa et al., 2020   |
|                        |                        |                     | Cui et al., 2018;            | Imhann et al., 2016   |
|                        |                        |                     | Crovesy et al., 2020;        | Lin et al., 2021      |
|                        |                        |                     | Bowerman et al., 2020;       | Nagata et al., 2022   |
|                        |                        |                     | Calderón-Pérez et al., 2020; | Palleja et al., 2018  |
|                        |                        |                     | Ni et al., 2021;             | Parker et al., 2017   |
|                        |                        |                     | Jiao et al., 2021;           | Singh et al., 2022    |
|                        |                        |                     | Behary et al., 2021;         | Vich Vila et al. 2020 |
|                        |                        |                     | Solé et al., 2021;           |                       |
|                        |                        |                     | Nakai et al., 2021;          |                       |
|                        |                        |                     | Aasmets et al., 2022;        |                       |
|                        |                        |                     | Gacesa et al., 2022          |                       |
|                        |                        |                     |                              | Derosa et al., 2020   |
|                        |                        |                     |                              | Li et al., 2021       |
|                        |                        |                     |                              | Nagata et al., 2022   |
|                        |                        |                     |                              | Terrisse et al., 2021 |

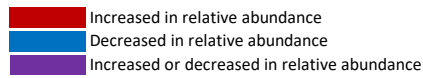



## Supplementary Methods

### ***Pan-cancer GOMS meta-analysis (FIG. 2 and Supplementary TABLES 2 and 3)***

We performed fecal taxonomic profiling with MetaPhlAn 4<sup>1</sup> on gut samples collected from adult individuals at first collection with corresponding age and gender information from 1,879 patients spanning 8 different cancers comprising 30 cohorts from 23 published studies<sup>2–24</sup> and 5,341 control individuals comprising 17 control cohorts from 14 published studies<sup>13,25–37</sup>. Studies were selected after a PubMed search in the English literature for the following key words: microbiota, microbiome, healthy volunteers, cancer, immune checkpoint inhibitors and metagenomics. Studies with online repository of metagenomics sequences as well as baseline characteristics including cancer histology, age and sex were then included. We excluded 7 studies i) sequencing was performed by 16S rRNA<sup>38–43</sup> or ii) metagenomics was not available online<sup>44</sup>. Twenty-six study-level data and metadata were already present in the curatedMetagenomicData (cMD) R package<sup>45</sup> and for newer, not yet included studies in cMD (11 in total; **Supplementary TABLE 2**), data and metadata were gathered from public repositories such as NCBI's Sequence Read Archive and Biosample repository; as well as in supplementary materials.

We implemented a Bayesian multinomial logistic-normal linear regression model called Pibble from the R package fido<sup>46</sup>, linking covariates that included cancer status, age and gender to compositional overdispersed count data. Only SGBs with a prevalence above 5% were kept in each cohort and their relative abundances were transformed into count values for Pibble via logistic-normal distribution modeling<sup>47</sup>. Log-ratios with 95% credible intervals were calculated for each SGB and each pairwise cancer/control comparison and were supplied to a random-effects model via the rem\_mv function in the MetaVolcanoR R package (v.1.4.0) using the restricted maximum-likelihood estimator model. For each cancer, only SGBs whose 95% credible interval was greater than or less than zero in >45% of pairwise comparisons were considered for downstream analysis. SGBs were then ranked centering around 0 according to their random effects model p-value and coefficient sign. SGBs without a rank in more than 2 cancers were discarded, and the average rank across cancers was determined using concordant ranks across the different cancers (**FIG. 2 and Supplementary TABLE 3**).

### ***R versus NR GOMS machine learning analysis (Supplementary TABLE 5)***

We applied a Leave-one-dataset-out (LODO) approach to CLR (centered log ratio) transformed SGB relative abundances; data from one cohort was set aside as an external validation set, whereas data from the remaining cohorts were pooled together as a single training set, iterating along all the cohorts. Cohorts with more than 20 samples were used in the LODO approach and model performance was assessed using the area under the receiver operator (AUC-ROC) values. We applied two different machine learning models;

i) Random Forest model implemented in the metaML package<sup>48</sup> using an ensemble of 1,000 estimator trees and Shannon entropy to evaluate the quality of a split at each node of a tree. The minimum number of samples per leaf and the number of features per tree were 5 and 30%, respectively.

ii) L1-regularized (Lasso) logistic regression model implemented in the SIAMCAT R package (v.1.6.0)<sup>49</sup>. The lambda parameter was selected to maximise the AUC-ROC under the constraint that the model contained at least five nonzero coefficients (**Supplementary TABLE 5**).

### ***R versus NR GOMS meta and mega analysis (FIG. 3 and 4 and Supplementary TABLES 6 and 7)***

We performed fecal taxonomic profiling with MetaPhlAn 4<sup>1</sup> on 808 patients classified as responders (R, n=263) and non-responders (NR, n=545), based on RECIST 1.1, encompassing criteria for objective response rates (R meaning PR and CR, while NR was SD and PD) comprising 12 cohorts from 8 published studies<sup>2-9</sup>. Studies were selected after an initial PubMed search as explained above. Then based on the availability of online data regarding age, gender and RECIST 1.1 classification studies were included. Similar to the pan-cancer data collection process, half of the studies' data and metadata were already present in the curatedMetagenomicData (cMD) R package<sup>45</sup> and the same approach was conducted (as described above).

For mega-analysis, only SGBs with a prevalence above 5% were kept and cohort information was included in the pibble model along with response, age and gender. Only SGBs' log-ratios whose 95% credible intervals were above or below zero were considered (**FIG. 3 and Supplementary TABLE 6**).

For the meta-analysis, an ensemble of differential abundance methods and normalizations (8 in total) were used to estimate fold changes (or log ratios) with their respective confidence intervals between responders and non-responders and supplied to a random-effects model via the `rem_mv` function in the `MetaVolcanoR` R package (v.1.4.0) using the restricted maximum-likelihood estimator model. For methods requiring count data (i–v and vii), absolute raw counts were estimated from SGB-level MetaPhlAn 4 relative abundances by multiplying these values by the total number of reads for each sample (**FIG. 4 and Supplementary TABLE 7**).

- i. DESeq2 (v.1.30.0)<sup>50</sup> with the `poscounts` estimator (`DESeq2_poscounts`);
- ii. DESeq2 with the `poscounts` estimator and a zero-inflated negative binomial model (`DESeq2_poscounts_zb`), and observational weights were computed using the `zinbwave` package (v.1.12.0)<sup>51</sup> and supplied to the `DESeqDataSet` class object to account for zero inflation;
- iii. DESeq2 with trimmed mean of *M* values (TMM; `DESeq2_TMM`), where normalization factors were calculated using TMM normalization, and a negative binomial generalized log-linear model was fit to the read counts of each feature using the `glmFit` function and the `edgeR` (v.3.32.0)<sup>52</sup> package;
- iv. `limma` (v3.46.0)<sup>53</sup> with TMM values (`limma_voom_TMM`) (the `limma` package includes a `voom` function that transforms previously normalized counts to log counts per million, estimates a mean–variance relationship and uses this to compute appropriate observational-level weights);
- v. `limma` with TMM values and a zero-inflated negative binomial model (`limma_voom_TMM_zb`) (to adapt the `limma-voom` framework to zero inflation, `zinbwave` weights were multiplied by `voom` weights);
- vi. ANCOM-BC (v.1.0.1)<sup>54</sup>, which uses a linear regression framework in log scale and accounts for sampling fraction by introducing a sample-specific bias correction that is estimated from the observed data (we used the same parameters as described in the univariate/multivariate analysis);

vii. Maaslin2 (v.1.4.0)<sup>55</sup>, where logit-transformed relative abundances were normalized with total-sum scaling and supplied to the maaslin2 function using the variable of interest as a fixed effect;

viii. Standardized mean differences (relative abundances were arcsine-square root transformed and followed the same procedure as in Thomas et al.<sup>15</sup>);

ix. Pibble (v.1.4.0), a Bayesian multinomial logistic-normal linear regression model from the R package fido<sup>46</sup>, linking covariates that included response, age and gender to compositional overdispersed count data.

#### ***Data and code availability***

Code and data to reproduce the analysis reported in this review can be found in the Github repository: [https://github.com/andrewmaltezthomas/NRCO\\_GOMS](https://github.com/andrewmaltezthomas/NRCO_GOMS)

## Supplementary References

1. Blanco-Miguez, A. *et al.* Extending and improving metagenomic taxonomic profiling with uncharacterized species with MetaPhlan 4. 2022.08.22.504593 Preprint at <https://doi.org/10.1101/2022.08.22.504593> (2022).
2. Gopalakrishnan, V. *et al.* Gut microbiome modulates response to anti-PD-1 immunotherapy in melanoma patients. *Science* **359**, 97–103 (2018).
3. Lee, K. A. *et al.* Cross-cohort gut microbiome associations with immune checkpoint inhibitor response in advanced melanoma. *Nat Med* **28**, 535–544 (2022).
4. McCulloch, J. A. *et al.* Intestinal microbiota signatures of clinical response and immune-related adverse events in melanoma patients treated with anti-PD-1. *Nat Med* **28**, 545–556 (2022).
5. Derosa, L. *et al.* Intestinal *Akkermansia muciniphila* predicts clinical response to PD-1 blockade in patients with advanced non-small-cell lung cancer. *Nat Med* **28**, 315–324 (2022).
6. Routy, B. *et al.* Gut microbiome influences efficacy of PD-1–based immunotherapy against epithelial tumors. *Science* **359**, 91–97 (2018).
7. Wind, T. T. *et al.* Gut microbial species and metabolic pathways associated with response to treatment with immune checkpoint inhibitors in metastatic melanoma. *Melanoma Res* **30**, 235–246 (2020).
8. Derosa, L. *et al.* Gut Bacteria Composition Drives Primary Resistance to Cancer Immunotherapy in Renal Cell Carcinoma Patients. *Eur Urol* **78**, 195–206 (2020).
9. Frankel, A. E. *et al.* Metagenomic Shotgun Sequencing and Unbiased Metabolomic Profiling Identify Specific Human Gut Microbiota and Metabolites Associated with Immune Checkpoint Therapy Efficacy in Melanoma Patients. *Neoplasia* **19**, 848–855 (2017).
10. Nagata, N. *et al.* Metagenomic Identification of Microbial Signatures Predicting Pancreatic Cancer From a Multinational Study. *Gastroenterology* **163**, 222–238 (2022).

11. Yu, J. *et al.* Metagenomic analysis of faecal microbiome as a tool towards targeted non-invasive biomarkers for colorectal cancer. *Gut* **66**, 70–78 (2017).
12. Feng, Q. *et al.* Gut microbiome development along the colorectal adenoma-carcinoma sequence. *Nat Commun* **6**, 6528 (2015).
13. Yachida, S. *et al.* Metagenomic and metabolomic analyses reveal distinct stage-specific phenotypes of the gut microbiota in colorectal cancer. *Nat Med* **25**, 968–976 (2019).
14. Wirbel, J. *et al.* Meta-analysis of fecal metagenomes reveals global microbial signatures that are specific for colorectal cancer. *Nat Med* **25**, 679–689 (2019).
15. Thomas, A. M. *et al.* Metagenomic analysis of colorectal cancer datasets identifies cross-cohort microbial diagnostic signatures and a link with choline degradation. *Nat Med* **25**, 667–678 (2019).
16. Vogtmann, E. *et al.* Colorectal Cancer and the Human Gut Microbiome: Reproducibility with Whole-Genome Shotgun Sequencing. *PLoS One* **11**, e0155362 (2016).
17. Zeller, G. *et al.* Potential of fecal microbiota for early-stage detection of colorectal cancer. *Mol Syst Biol* **10**, 766 (2014).
18. Yonekura, S. *et al.* Cancer Induces a Stress Ileopathy Depending on  $\beta$ -Adrenergic Receptors and Promoting Dysbiosis that Contributes to Carcinogenesis. *Cancer Discovery* **12**, 1128–1151 (2022).
19. Spencer, C. N. *et al.* Dietary fiber and probiotics influence the gut microbiome and melanoma immunotherapy response. *Science* **374**, 1632–1640 (2021).
20. Kartal, E. *et al.* A faecal microbiota signature with high specificity for pancreatic cancer. *Gut* **71**, 1359–1372 (2022).
21. Terrisse, S. *et al.* Immune system and intestinal microbiota determine efficacy of androgen deprivation therapy against prostate cancer. *J Immunother Cancer* **10**, e004191 (2022).
22. Terrisse, S. *et al.* Intestinal microbiota influences clinical outcome and side effects of early breast cancer treatment. *Cell Death Differ* **28**, 2778–2796 (2021).

23. Pernigoni, N. *et al.* Commensal bacteria promote endocrine resistance in prostate cancer through androgen biosynthesis. *Science* **374**, 216–224 (2021).
24. Peters, B. A. *et al.* Relating the gut metagenome and metatranscriptome to immunotherapy responses in melanoma patients. *Genome Med* **11**, 61 (2019).
25. Asnicar, F. *et al.* Microbiome connections with host metabolism and habitual diet from 1,098 deeply phenotyped individuals. *Nat Med* **27**, 321–332 (2021).
26. De Filippis, F. *et al.* Distinct Genetic and Functional Traits of Human Intestinal *Prevotella copri* Strains Are Associated with Different Habitual Diets. *Cell Host Microbe* **25**, 444-453.e3 (2019).
27. Dhakan, D. B. *et al.* The unique composition of Indian gut microbiome, gene catalogue, and associated fecal metabolome deciphered using multi-omics approaches. *Gigascience* **8**, giz004 (2019).
28. Human Microbiome Project Consortium. Structure, function and diversity of the healthy human microbiome. *Nature* **486**, 207–214 (2012).
29. Keohane, D. M. *et al.* Microbiome and health implications for ethnic minorities after enforced lifestyle changes. *Nat Med* **26**, 1089–1095 (2020).
30. Zhernakova, A. *et al.* Population-based metagenomics analysis reveals markers for gut microbiome composition and diversity. *Science* **352**, 565–569 (2016).
31. Vieira-Silva, S. *et al.* Statin therapy is associated with lower prevalence of gut microbiota dysbiosis. *Nature* **581**, 310–315 (2020).
32. Nielsen, H. B. *et al.* Identification and assembly of genomes and genetic elements in complex metagenomic samples without using reference genomes. *Nat Biotechnol* **32**, 822–828 (2014).
33. Qin, J. *et al.* A metagenome-wide association study of gut microbiota in type 2 diabetes. *Nature* **490**, 55–60 (2012).
34. Qin, N. *et al.* Alterations of the human gut microbiome in liver cirrhosis. *Nature* **513**, 59–64 (2014).

35. Schirmer, M. *et al.* Linking the Human Gut Microbiome to Inflammatory Cytokine Production Capacity. *Cell* **167**, 1897 (2016).
36. Xie, H. *et al.* Shotgun Metagenomics of 250 Adult Twins Reveals Genetic and Environmental Impacts on the Gut Microbiome. *Cell Syst* **3**, 572-584.e3 (2016).
37. Zeevi, D. *et al.* Personalized Nutrition by Prediction of Glycemic Responses. *Cell* **163**, 1079–1094 (2015).
38. Hakozaiki, T. *et al.* The Gut Microbiome Associates with Immune Checkpoint Inhibition Outcomes in Patients with Advanced Non-Small Cell Lung Cancer. *Cancer Immunol Res* **8**, 1243–1250 (2020).
39. Jin, Y. *et al.* The Diversity of Gut Microbiome is Associated With Favorable Responses to Anti-Programmed Death 1 Immunotherapy in Chinese Patients With NSCLC. *J Thorac Oncol* **14**, 1378–1389 (2019).
40. Matson, V. *et al.* The commensal microbiome is associated with anti-PD-1 efficacy in metastatic melanoma patients. *Science* **359**, 104–108 (2018).
41. Chaput, N. *et al.* Baseline gut microbiota predicts clinical response and colitis in metastatic melanoma patients treated with ipilimumab. *Ann Oncol* **28**, 1368–1379 (2017).
42. Coutzac, C. *et al.* Systemic short chain fatty acids limit antitumor effect of CTLA-4 blockade in hosts with cancer. *Nat Commun* **11**, 2168 (2020).
43. Zhang, C. *et al.* Commensal microbiota contributes to predicting the response to immune checkpoint inhibitors in non-small-cell lung cancer patients. *Cancer Sci* **112**, 3005–3017 (2021).
44. Salgia, N. J. *et al.* Stool Microbiome Profiling of Patients with Metastatic Renal Cell Carcinoma Receiving Anti-PD-1 Immune Checkpoint Inhibitors. *Eur Urol* **78**, 498–502 (2020).
45. Pasolli, E. *et al.* Accessible, curated metagenomic data through ExperimentHub. *Nat Methods* **14**, 1023–1024 (2017).



46. Silverman, J. D., Roche, K., Holmes, Z. C., David, L. A. & Mukherjee, S. Bayesian Multinomial Logistic Normal Models through Marginally Latent Matrix-T Processes. *Journal of Machine Learning Research* **23**, 1–42 (2022).
47. Aitchison, J. & Shen, S. M. Logistic-Normal Distributions: Some Properties and Uses. *Biometrika* **67**, 261–272 (1980).
48. Pasolli, E., Truong, D. T., Malik, F., Waldron, L. & Segata, N. Machine Learning Meta-analysis of Large Metagenomic Datasets: Tools and Biological Insights. *PLoS Comput Biol* **12**, e1004977 (2016).
49. Wirbel, J. *et al.* Microbiome meta-analysis and cross-disease comparison enabled by the SIAMCAT machine learning toolbox. *Genome Biol* **22**, 93 (2021).
50. Love, M. I., Huber, W. & Anders, S. Moderated estimation of fold change and dispersion for RNA-seq data with DESeq2. *Genome Biology* **15**, 550 (2014).
51. Risso, D., Perraudeau, F., Gribkova, S., Dudoit, S. & Vert, J.-P. A general and flexible method for signal extraction from single-cell RNA-seq data. *Nat Commun* **9**, 284 (2018).
52. Robinson, M. D., McCarthy, D. J. & Smyth, G. K. edgeR: a Bioconductor package for differential expression analysis of digital gene expression data. *Bioinformatics* **26**, 139–140 (2010).
53. Ritchie, M. E. *et al.* limma powers differential expression analyses for RNA-sequencing and microarray studies. *Nucleic Acids Res* **43**, e47 (2015).
54. Lin, H. & Peddada, S. D. Analysis of compositions of microbiomes with bias correction. *Nat Commun* **11**, 3514 (2020).
55. Mallick, H. *et al.* Multivariable association discovery in population-scale meta-omics studies. *PLoS Comput Biol* **17**, e1009442 (2021).
